# Supplementary material for: Grapevine Grafting: Scion Transcript Profiling and Defense-Related Metabolites Induced by Rootstocks
Source: Front Plant Sci. 2017 Apr 27;8:654. doi: 10.3389/fpls.2017.00654 (PMC5407058; doi:10.3389/fpls.2017.00654)
Supplement: Supplementary file 3 [file Table3.XLSX]

## Sheet: ALL_common DEGs
Supplemental Table S3. Differentially expressed genes with |log2FC| ≥ 2.
					log2 (Fold change)
gene_id	Gene Annotation	EC or Kegg ID	Network	Functional Cathegory	GAG-KOB vs GAG-1103P	GAG-3309C vs GAG-1103P	GAG-41B vs GAG-1103P	GAG-17-37 vs GAG-1103P
VIT_04s0008g01140	beta-fructosidase (BFRUCT1)	E3_2_1_26	vv10052Galactose_metabolism vv10500Starch_and_sucrose_metabolism	Carbohydrate Metabolic Process	3.02873	2.15737	3.83918	2.04339
VIT_04s0023g03040	lactoylglutathione lyase	E4_4_1_5	vv10620Pyruvate_metabolism	Carbohydrate Metabolic Process	2.44221	2.33364	2.7461	2.25221
VIT_08s0007g06060	Beta 1-3 glucanase	E3_2_1_6		Carbohydrate Metabolic Process	2.89543	3.77863	3.45087	2.28067
VIT_05s0020g03280	copper amine oxidase	E1_4_3_4	vv10220Urea_cycle_and_metabolism_of_amino_groups vv10340Histidine_metabolism vv10350Tyrosine_metabolism vv10360Phenylalanine_metabolism vv11002Auxin_biosynthesis	Cellular Amino Acids and Derivative Metabolic Process	3.25733	2.98337	3.5123	2.87405
VIT_12s0055g00920	aspartate aminotransferase	E2_6_1_1	vv10252Alanine_and_aspartate_metabolism vv10272Cysteine_metabolism vv10330Arginine_and_proline_metabolism vv10350Tyrosine_metabolism vv10360Phenylalanine_metabolism vv10400Phenylalanine_tyrosine_and_tryptophan_biosynthesis vv10710Carbon_fixation vv10950Alkaloid_biosynthesis_I	Cellular Amino Acids and Derivative Metabolic Process	2.96487	2.02164	2.26976	2.54353
VIT_05s0020g02720	7S globulin precursor, basic		s	Cellular Amino Acids and Derivative Metabolic Process	-2.4472	-2.08008	-3.22469	-2.28105
VIT_06s0004g06830	Asparagine synthetase	E6_3_5_4	vv10910Nitrogen_metabolism	Cellular Amino Acids and Derivative Metabolic Process	-6.3578	-6.33242	-7.14544	-4.61192
VIT_05s0020g00950	aspartyl protease	E3_4_23_40		Cellular Homeostasis	2.64057	2.70403	2.08456	2.99716
VIT_10s0116g01270	F-box family protein			Cellular Homeostasis	3.22849	2.08115	5.6025	3.11854
VIT_10s0116g01290	F-box family protein			Cellular Homeostasis	4.3502	2.41121	5.64931	2.96609
VIT_10s0116g01310	F-box family protein			Cellular Homeostasis	3.53943	2.35779	4.78498	2.51735
VIT_10s0116g01360	F-box family protein			Cellular Homeostasis	3.52493	2.12852	5.02416	2.11691
VIT_11s0052g01070	Transferase			Cellular Homeostasis	4.34517	3.87787	7.27953	2.95916
VIT_14s0060g00330	aspartyl protease	E3_4_23_40		Cellular Homeostasis	3.21589	3.17044	2.81403	3.46919
VIT_16s0050g01870	CAAX amino terminal protease			Cellular Homeostasis	-2.42293	-2.79553	-3.94502	-2.12781
VIT_06s0004g07250	UDP-glucoronosyl and UDP-glucosyl transferase			Cellular Process	3.4835	2.62362	5.15422	2.6752
VIT_07s0005g05680	Tetratricopeptide repeat domain male sterility MS5			Cellular Process	2.8835	2.27449	3.97364	2.03131
VIT_11s0016g00570	Dimethylaniline monooxygenase (N-oxide forming) 2	E1_14_13_8	vv11000Single_reactions	Cellular Process	3.84704	3.59213	6.64865	4.12371
VIT_11s0016g01530	ankyrin repeat family protein			Cellular Process	3.79345	4.19047	4.33861	3.25105
VIT_11s0016g01650	ankyrin repeat			Cellular Process	3.83024	4.25444	4.39253	3.39795
VIT_11s0016g01670	ankyrin repeat			Cellular Process	3.89763	4.3135	4.47353	3.49287
VIT_07s0129g01080	MICROTUBULE END BINDING PROTEIN 1 (EB1)	K10436	vv44810Regulation_of_actin_cytoskeleton	Developmental Process	2.77954	2.58524	3.75318	2.2196
VIT_00s0274g00090	quinone oxidoreductase	K03956	vv10190Oxidative_phosphorylation vv50134Primary_active_transporter_cat_D1	Generation of Energy	3.09977	3.2875	2.80487	3.20546
VIT_00s0301g00090	NDA2 (ALTERNATIVE NAD(P)H DEHYDROGENASE 2)	K03885	vv10190Oxidative_phosphorylation vv50134Primary_active_transporter_cat_D1	Generation of Energy	4.42323	2.56499	8.3306	2.42452
VIT_16s0050g00400	photoassimilate-responsive protein PAR-1a			Generation of Energy	2.89225	2.30742	4.26096	2.36996
VIT_16s0050g00410	photoassimilate-responsive protein PAR-1a			Generation of Energy	3.15953	2.08088	5.31453	2.56838
VIT_16s0050g00430	photoassimilate-responsive protein PAR-1a			Generation of Energy	2.64043	2.84179	4.31753	3.67637
VIT_06s0004g01470	lipoxygenase LOX1	E1_13_11_12	vv10592alpha-Linolenic_acid_metabolism	Lipid Metabolic Process	2.88603	2.76178	3.7594	2.38492
VIT_09s0002g00510	lipase GDSL 1			Lipid Metabolic Process	2.14334	2.55683	4.82768	2.50765
VIT_14s0066g01670	alpha-dioxygenase	K10529	vv10592alpha-Linolenic_acid_metabolism	Lipid Metabolic Process	2.69894	3.68023	5.29176	3.60105
VIT_18s0001g10410	triacylglycerol lipase	E3_1_1_3	vv10561Glycerolipid_metabolism	Lipid Metabolic Process	3.83953	3.63829	4.86741	2.86803
VIT_01s0011g03430	no hit			no hit	5.07902	3.3647	6.39331	2.09036
VIT_06s0004g01990	no hit			no hit	3.43213	3.02976	3.70333	2.80753
VIT_06s0004g02010	no hit			no hit	3.29866	2.05914	3.11114	2.62991
VIT_08s0007g05830	no hit			no hit	2.9942	2.70818	5.55428	2.77801
VIT_10s0003g03430	no hit			no hit	2.81712	3.64383	2.70823	2.60724
VIT_10s0003g04080	no hit			no hit	3.04115	3.07336	4.53406	2.72682
VIT_11s0016g01620	no hit			no hit	4.0919	4.91196	4.31224	3.72913
VIT_14s0068g00190	no hit			no hit	2.57465	2.05346	2.09181	2.13867
VIT_12s0059g00440	no hit			no hit	-3.62897	-3.47935	-7.33112	-2.46444
VIT_19s0090g01340	no hit			no hit	-3.85808	-3.42582	-5.95192	-2.4143
VIT_02s0012g00830	Expansin-like B1	EXPB1	vv30003Auxin_signaling	Response to Hormone Stimulus	2.47835	2.64291	4.96275	2.15852
VIT_02s0033g00670	nitrilase 4B	E3_5_5_1	vv10460Cyanoamino_acid_metabolism vv10910Nitrogen_metabolism vv11002Auxin_biosynthesis	Response to Hormone Stimulus	3.6303	3.65254	5.20559	3.4662
VIT_02s0033g00700	nitrilase	E3_5_5_1	vv10460Cyanoamino_acid_metabolism vv10910Nitrogen_metabolism vv11002Auxin_biosynthesis	Response to Hormone Stimulus	2.5665	3.07255	4.56861	2.60691
VIT_02s0109g00430	nitrilase 4 (NIT4)	K13035	vv10910Nitrogen_metabolism	Response to Hormone Stimulus	4.16632	3.7002	5.17758	3.74891
VIT_18s0041g02010	12-oxophytodienoate reductase 1	E1_3_1_42	vv10592alpha-Linolenic_acid_metabolism	Response to Hormone Stimulus	2.34409	2.22841	3.10541	2.2559
VIT_00s0179g00280	Calmodulin-8 (CAM8)	K02183	vv34020Calcium_signaling_pathway vv34626Plant-pathogen_interaction	Response to Stress	2.56626	2.60506	3.19021	2.81255
VIT_01s0011g00990	disease resistance protein (NBS-LRR class)	K13457	vv34626Plant-pathogen_interaction	Response to Stress	3.41952	3.10467	5.5052	2.77526
VIT_02s0025g04230	thaumatin [Vitis vinifera]			Response to Stress	4.76302	4.57253	6.21845	3.26266
VIT_03s0088g00700	Pathogenesis related protein 1 precursor (pr1 gene)	PRP1	vv30011Jasmonate_signaling vv34626Plant-pathogen_interaction	Response to Stress	4.97109	5.11411	4.98572	3.42947
VIT_03s0088g00710	pathogenesis-related protein 1 precursor (PRP 1)	PRP1	vv30011Jasmonate_signaling vv34626Plant-pathogen_interaction	Response to Stress	3.42945	3.10292	4.28469	2.54739
VIT_05s0077g01530	pathogenesis protein 10 [Vitis vinifera]			Response to Stress	2.7061	2.75909	3.25304	2.49374
VIT_05s0077g01540	Bet v I allergen			Response to Stress	2.55176	2.94092	3.25313	2.55016
VIT_05s0077g01550	pathogenesis protein 10.3 [Vitis quinquangularis]			Response to Stress	2.17394	3.24029	2.39144	3.0584
VIT_05s0077g01560	pathogenesis protein 10.3 [Vitis quinquangularis]			Response to Stress	2.04863	2.94932	2.23536	2.36518
VIT_05s0077g01690	pathogenesis protein 10 [Vitis vinifera]			Response to Stress	2.73449	2.54111	5.79996	2.56148
VIT_06s0004g01000	Dirigent protein			Response to Stress	3.0712	3.27906	4.52131	2.06729
VIT_06s0004g01010	dirigent protein pDIR9			Response to Stress	3.73579	3.46918	4.82417	2.43261
VIT_06s0004g01030	dirigent protein			Response to Stress	3.1382	2.60978	4.80844	2.20693
VIT_09s0002g00600	RPP27 (RESISTANCE TO PERONOSPORA PARASITICA 27)			Response to Stress	4.05431	2.72628	4.26301	2.49529
VIT_13s0019g04060	MLO1	K08472		Response to Stress	2.78537	2.10651	3.98844	2.03675
VIT_18s0001g06890	peroxidase GvPx2b, class III [Vitis vinifera]	E1_11_1_7	vv10360Phenylalanine_metabolism vv10680Methane_metabolism	Response to Stress	2.50155	2.98552	3.50601	2.70339
VIT_18s0001g10850	patatin			Response to Stress	4.86011	4.43097	6.04793	3.46376
VIT_19s0014g03970	Calcium-binding EF-hand			Response to Stress	2.87887	3.23965	2.83891	2.99971
VIT_03s0017g02120	UDP-glucose flavonoid 3-O-glucosyltransferase 2	E2_4_1_91	vv10941Flavonoid_biosynthesis	Secondary Metabolic Process	3.90305	3.64137	5.24574	2.9227
VIT_03s0017g02140	Tetrahydroxychalcone 2'-glucosyltransferase	THCGT	vv10941Flavonoid_biosynthesis	Secondary Metabolic Process	3.36284	3.22632	4.59142	2.42377
VIT_07s0031g03070	isoflavone reductase	E1_3_1_45	vv10943Isoflavonoid_biosynthesis	Secondary Metabolic Process	4.52173	3.87112	4.64118	2.8775
VIT_07s0141g00890	CYP94A1			Secondary Metabolic Process	3.24625	2.57022	4.60929	2.12072
VIT_07s0151g01070	copalyl diphosphate synthase	E5_5_1_12	vv10904Diterpenoid_biosynthesis	Secondary Metabolic Process	3.14899	3.14032	4.65536	2.01102
VIT_08s0040g00920	Glutathione S-transferase 25 GSTU7	E2_5_1_18_GSTU7	vv10480Glutathione_metabolism	Secondary Metabolic Process	4.74108	3.06847	5.19613	2.07008
VIT_10s0042g00840	stilbene synthase [Vitis pseudoreticulata]	E2_3_1_95	vv10940Phenylpropanoid_biosynthesis	Secondary Metabolic Process	3.81552	2.64603	7.30965	2.20905
VIT_10s0042g00860	stilbene synthase [Vitis pseudoreticulata]	E2_3_1_95	vv10940Phenylpropanoid_biosynthesis	Secondary Metabolic Process	3.68969	2.19785	7.28832	2.11451
VIT_10s0042g00870	stilbene synthase [Vitis vinifera]	E2_3_1_95	vv10940Phenylpropanoid_biosynthesis	Secondary Metabolic Process	3.30896	2.11635	6.56551	2.34569
VIT_10s0042g00910	stilbene synthase [Vitis pseudoreticulata]	E2_3_1_95	vv10940Phenylpropanoid_biosynthesis	Secondary Metabolic Process	3.54299	2.21847	6.7684	2.44198
VIT_10s0042g00930	stilbene synthase [Vitis pseudoreticulata]	E2_3_1_95	vv10940Phenylpropanoid_biosynthesis	Secondary Metabolic Process	3.42477	2.16256	6.66989	2.17482
VIT_11s0078g00290	cinnamate 4-hydroxylase	E1_14_13_11	vv10360Phenylalanine_metabolism vv10940Phenylpropanoid_biosynthesis	Secondary Metabolic Process	2.57046	2.70891	3.10212	2.2677
VIT_14s0030g00650	shikimate dehydrogenase	E1_1_1_25	vv10400Phenylalanine_tyrosine_and_tryptophan_biosynthesis	Secondary Metabolic Process	2.2378	2.75349	2.72187	2.52391
VIT_15s0048g01950	CYP87A3			Secondary Metabolic Process	2.57416	3.0092	3.24664	2.47335
VIT_15s0048g01960	CYP87A3			Secondary Metabolic Process	2.39076	2.89615	3.17272	2.47095
VIT_16s0039g01100	phenylalanin ammonia-lyase [Vitis vinifera]	E4_3_1_5	vv10350Tyrosine_metabolism vv10360Phenylalanine_metabolism vv10910Nitrogen_metabolism vv10940Phenylpropanoid_biosynthesis	Secondary Metabolic Process	3.4732	2.36018	6.40908	2.42012
VIT_16s0039g01120	phenylalanin ammonia-lyase [Vitis vinifera]	E4_3_1_5	vv10350Tyrosine_metabolism vv10360Phenylalanine_metabolism vv10910Nitrogen_metabolism vv10940Phenylpropanoid_biosynthesis	Secondary Metabolic Process	3.485	2.45397	6.38412	2.29261
VIT_16s0039g01130	phenylalanin ammonia-lyase [Vitis vinifera]	E4_3_1_5	vv10350Tyrosine_metabolism vv10360Phenylalanine_metabolism vv10910Nitrogen_metabolism vv10940Phenylpropanoid_biosynthesis	Secondary Metabolic Process	3.2212	2.12628	5.84628	2.18133
VIT_16s0039g01170	phenylalanine ammonium lyase	E4_3_1_5	vv10350Tyrosine_metabolism vv10360Phenylalanine_metabolism vv10910Nitrogen_metabolism vv10940Phenylpropanoid_biosynthesis	Secondary Metabolic Process	3.61457	2.331	6.37899	2.77171
VIT_16s0039g01300	phenylalanine ammonia-lyase [Vitis vinifera]	E4_3_1_5	vv10350Tyrosine_metabolism vv10360Phenylalanine_metabolism vv10910Nitrogen_metabolism vv10940Phenylpropanoid_biosynthesis	Secondary Metabolic Process	3.48348	2.30467	6.22746	2.48157
VIT_16s0039g01360	phenylalanin ammonia-lyase [Vitis vinifera]	E4_3_1_5	vv10350Tyrosine_metabolism vv10360Phenylalanine_metabolism vv10910Nitrogen_metabolism vv10940Phenylpropanoid_biosynthesis	Secondary Metabolic Process	3.57751	2.60856	6.2782	2.37374
VIT_16s0100g00750	Stilbene synthase	E2_3_1_95	vv10940Phenylpropanoid_biosynthesis	Secondary Metabolic Process	4.20391	3.83027	6.9768	3.73615
VIT_16s0100g00760	Stilbene synthase 3	E2_3_1_95	vv10940Phenylpropanoid_biosynthesis	Secondary Metabolic Process	3.68376	3.41865	6.85117	3.05758
VIT_16s0100g00770	Stilbene synthase	E2_3_1_95	vv10940Phenylpropanoid_biosynthesis	Secondary Metabolic Process	3.84471	3.16206	7.55563	3.23574
VIT_16s0100g00780	Stilbene synthase	E2_3_1_95	vv10940Phenylpropanoid_biosynthesis	Secondary Metabolic Process	3.26365	3.03687	5.31728	2.95492
VIT_16s0100g00800	Stilbene synthase 4	E2_3_1_95	vv10940Phenylpropanoid_biosynthesis	Secondary Metabolic Process	3.59845	2.57565	6.52373	2.24989
VIT_16s0100g00810	stilbene synthase [Vitis vinifera]	E2_3_1_95	vv10940Phenylpropanoid_biosynthesis	Secondary Metabolic Process	3.6508	2.54269	6.75299	2.24801
VIT_16s0100g00830	Stilbene synthase	E2_3_1_95	vv10940Phenylpropanoid_biosynthesis	Secondary Metabolic Process	3.80513	2.8698	6.89399	2.63916
VIT_16s0100g00840	Stilbene synthase 4	E2_3_1_95	vv10940Phenylpropanoid_biosynthesis	Secondary Metabolic Process	3.63049	2.58902	6.59259	2.25141
VIT_16s0100g00850	Stilbene synthase	E2_3_1_95	vv10940Phenylpropanoid_biosynthesis	Secondary Metabolic Process	3.88196	2.50688	6.56977	2.44574
VIT_16s0100g00860	chalcone synthase	E2_3_1_74	vv10941Flavonoid_biosynthesis	Secondary Metabolic Process	3.55263	2.5935	7.15112	2.29181
VIT_16s0100g00880	stilbene synthase [Vitis pseudoreticulata]	E2_3_1_95	vv10940Phenylpropanoid_biosynthesis	Secondary Metabolic Process	3.58808	2.49253	7.14044	2.16391
VIT_16s0100g00900	stilbene synthase [Vitis pseudoreticulata]	E2_3_1_95	vv10940Phenylpropanoid_biosynthesis	Secondary Metabolic Process	3.52147	2.41559	7.00863	2.12365
VIT_16s0100g00910	stilbene synthase - grape	E2_3_1_95	vv10940Phenylpropanoid_biosynthesis	Secondary Metabolic Process	3.69901	2.72838	6.85851	2.57558
VIT_16s0100g00920	Stilbene synthase 4	E2_3_1_95	vv10940Phenylpropanoid_biosynthesis	Secondary Metabolic Process	3.67976	2.62056	6.55307	2.20189
VIT_16s0100g00930	Stilbene synthase 2	E2_3_1_95	vv10940Phenylpropanoid_biosynthesis	Secondary Metabolic Process	3.71884	2.43879	6.44885	2.12297
VIT_16s0100g00940	stilbene synthase 3 [Vitis sp. cv. 'Norton']	E2_3_1_95	vv10940Phenylpropanoid_biosynthesis	Secondary Metabolic Process	3.4753	2.29144	6.6649	2.07134
VIT_16s0100g00950	Stilbene synthase 3	E2_3_1_95	vv10940Phenylpropanoid_biosynthesis	Secondary Metabolic Process	4.07265	2.80602	7.49607	2.85215
VIT_16s0100g00990	Stilbene synthase 2	E2_3_1_95	vv10940Phenylpropanoid_biosynthesis	Secondary Metabolic Process	4.14735	2.75595	7.45165	2.93057
VIT_16s0100g01000	Stilbene synthase 4	E2_3_1_95	vv10940Phenylpropanoid_biosynthesis	Secondary Metabolic Process	3.39533	2.23734	6.74035	2.13818
VIT_16s0100g01010	Stilbene synthase 2	E2_3_1_95	vv10940Phenylpropanoid_biosynthesis	Secondary Metabolic Process	4.04854	2.73216	7.33548	2.73396
VIT_16s0100g01020	stilbene synthase [Vitis pseudoreticulata]	E2_3_1_95	vv10940Phenylpropanoid_biosynthesis	Secondary Metabolic Process	3.62623	2.41165	7.24932	2.21202
VIT_16s0100g01030	stilbene synthase [Vitis quinquangularis]	E2_3_1_95	vv10940Phenylpropanoid_biosynthesis	Secondary Metabolic Process	4.04507	3.05817	6.94974	2.71498
VIT_16s0100g01040	stilbene synthase - grape	E2_3_1_95	vv10940Phenylpropanoid_biosynthesis	Secondary Metabolic Process	3.66503	2.9724	6.96469	2.52936
VIT_16s0100g01070	resveratrol synthase [Vitis vinifera]	E2_3_1_95	vv10940Phenylpropanoid_biosynthesis	Secondary Metabolic Process	4.29515	3.01796	7.6985	2.71224
VIT_16s0100g01100	Stilbene synthase	E2_3_1_95	vv10940Phenylpropanoid_biosynthesis	Secondary Metabolic Process	3.9323	3.18309	6.96765	3.68634
VIT_16s0100g01110	Resveratrol synthase (RS1)	E2_3_1_95	vv10940Phenylpropanoid_biosynthesis	Secondary Metabolic Process	3.59384	2.96877	6.03451	2.71725
VIT_16s0100g01120	Stilbene synthase	E2_3_1_95	vv10940Phenylpropanoid_biosynthesis	Secondary Metabolic Process	4.19903	3.6111	7.52153	3.41279
VIT_16s0100g01130	stilbene synthase [Vitis vinifera]	E2_3_1_95	vv10940Phenylpropanoid_biosynthesis	Secondary Metabolic Process	3.50917	2.35208	6.12337	2.89498
VIT_16s0100g01140	Stilbene synthase 2	E2_3_1_95	vv10940Phenylpropanoid_biosynthesis	Secondary Metabolic Process	4.14579	3.23503	7.33782	3.39461
VIT_16s0100g01160	stilbene synthase [Vitis vinifera]	E2_3_1_95	vv10940Phenylpropanoid_biosynthesis	Secondary Metabolic Process	3.84875	2.98681	6.48697	3.08037
VIT_16s0100g01170	stilbene synthase 1 [Vitis vinifera]	E2_3_1_95	vv10940Phenylpropanoid_biosynthesis	Secondary Metabolic Process	3.71962	2.85436	7.01542	3.0191
VIT_16s0100g01190	stilbene synthase [Vitis vinifera]	E2_3_1_95	vv10940Phenylpropanoid_biosynthesis	Secondary Metabolic Process	3.80963	3.04475	6.73677	3.10599
VIT_16s0100g01200	stilbene synthase	E2_3_1_95	vv10940Phenylpropanoid_biosynthesis	Secondary Metabolic Process	4.13953	3.22098	6.55996	2.98176
VIT_18s0001g04280	(-)-germacrene D synthase	E4_2_3_22	vv10900Terpenoid_biosynthesis	Secondary Metabolic Process	3.2052	3.78043	3.10901	3.49235
VIT_18s0117g00550	Laccase	E1_10_3_2	vv11000Single_reactions vv50109Incompletely_characterized_transport_systems	Secondary Metabolic Process	3.51686	2.52093	4.16138	3.06607
VIT_00s0258g00130	receptor kinase homolog LRK10			Signal Transduction	2.21384	2.43118	3.43257	2.2586
VIT_00s0262g00090	receptor kinase RK20-1			Signal Transduction	2.38555	2.09206	3.1617	2.03151
VIT_00s0409g00040	Cysteine-rich receptor-like protein kinase 15 RLK15			Signal Transduction	2.23513	2.25302	2.6174	2.18296
VIT_00s0429g00010	receptor kinase RK20-1			Signal Transduction	2.73425	2.20041	3.48869	3.03206
VIT_00s2745g00010	receptor kinase RK20-1			Signal Transduction	2.23482	2.10085	2.93985	2.00476
VIT_04s0079g00240	Leucine Rich Repeat receptor-like kinase			Signal Transduction	3.36642	3.23711	3.87001	2.48898
VIT_05s0020g03300	S-receptor kinase			Signal Transduction	2.72162	2.2279	2.86056	2.66153
VIT_06s0004g05170	lectin protein kinase			Signal Transduction	2.03232	2.34393	2.53787	2.60015
VIT_11s0037g00660	Leucine Rich Repeat receptor-like kinase	K13468	vv34626Plant-pathogen_interaction	Signal Transduction	2.75708	2.85649	3.54183	2.32996
VIT_12s0057g00800	Receptor Like Protein 27			Signal Transduction	3.13502	3.18691	2.40477	2.04887
VIT_18s0001g01960	RKF3 (RECEPTOR-LIKE KINASE IN IN FLOWERS 3)			Signal Transduction	2.8666	2.31488	5.53827	2.53309
VIT_18s0041g00020	Wall-associated receptor kinase 2			Signal Transduction	3.1913	3.14837	4.04725	2.36789
VIT_18s0041g01140	lectin protein kinase			Signal Transduction	3.46129	3.07024	2.7541	2.58434
VIT_18s0041g01160	lectin protein kinase			Signal Transduction	2.95358	2.67196	2.31061	2.07752
VIT_18s0041g01170	lectin protein kinase			Signal Transduction	3.84526	3.44266	3.49791	3.05565
VIT_18s0041g01210	lectin protein kinase			Signal Transduction	3.6182	2.97944	2.54392	2.60169
VIT_07s0005g01950	myb domain protein 78	MYB78	vv60044MYB	Transcription Factor Activity	4.23168	3.74041	6.18064	2.35028
VIT_13s0019g04440	zinc finger (C3HC4-type RING finger)	ZFC3HC4_163	vv60078Other_zf-C3HC4	Transcription Factor Activity	2.72482	2.26357	5.18831	2.18006
VIT_14s0068g01770	WRKY DNA-binding protein 75	WRKY75_2	vv60066WRKY	Transcription Factor Activity	3.06188	2.39056	5.32821	2.57775
VIT_00s0317g00140	exocyst subunit EXO70 H2	EXO70H2	vv50111Tethering_factors	Transport	3.8934	2.62243	5.24173	2.40616
VIT_00s0822g00010	WHITE-BROWN COMPLEX HOMOLOG PROTEIN 11	WBC11	vv52010ABC_transporters	Transport	2.20073	2.9517	2.20833	2.9923
VIT_03s0110g00360	Copper transporter 2	COPT2	vv50101Channels_and_pores	Transport	2.84305	2.82899	2.30631	2.70462
VIT_04s0044g00310	nodulin MtN21 family	MTN21	vv50122Porters_cat_7_to_17	Transport	2.7657	2.90946	4.08053	2.26761
VIT_06s0004g05070	zinc transporter (ZIP2)	ZIP2	vv50121Porters_cat_1_to_6	Transport	3.02636	2.32772	4.44269	2.228
VIT_06s0004g06570	Calcium/proton exchanger CAX3	K07300_CAX3	vv50123Porters_cat_18_to_29	Transport	2.6624	3.14272	2.4116	2.83841
VIT_09s0002g05490	ABC transporter g family pleiotropic drug resistance 12 PDR12	ABCGPDR12	vv52010ABC_transporters	Transport	3.31327	2.22063	5.15341	2.20487
VIT_09s0002g05560	ABC transporter g family pleiotropic drug resistance 12 PDR12	ABCGPDR12	vv52010ABC_transporters	Transport	2.98397	4.0151	2.91129	3.09061
VIT_09s0002g05810	Boron transporter-like protein 4	BOR4	vv50124Porters_cat_30_to_64	Transport	3.82893	2.40603	5.68112	2.0538
VIT_14s0066g02070	AAA-type ATPase			Transport	3.44688	2.68457	5.76397	2.24107
VIT_14s0066g02090	AAA-type ATPase			Transport	3.74172	2.94693	6.14215	2.86279
VIT_19s0014g01760	glutamate receptor 2.8	GLR2_8	vv50101Channels_and_pores	Transport	3.40845	3.23224	5.56914	2.75357
VIT_01s0127g00250	Kelch repeat-containing F-box protein			unknown	3.21895	2.27905	5.86429	2.38093
VIT_08s0007g01090	DC1 domain-containing protein			unknown	2.69605	3.46748	4.59761	2.47489
VIT_08s0040g00440	Unknown protein			unknown	2.70357	2.95193	3.71328	2.01995
VIT_09s0002g05610	unknown			unknown	3.29887	3.20889	5.36646	2.1114
VIT_13s0074g00340	unknown			unknown	3.72082	2.46203	6.08761	2.7049
VIT_14s0066g00050	Unknown protein			unknown	2.31981	3.41633	2.29561	2.26433

## Sheet: 3309C_41B_17-37_common DEGs
					log2 (Fold change)
gene_id	Gene Annotation	EC or Kegg ID	Network	Functional Cathegory	GAG-3309C vs GAG-1103P	GAG-41B vs GAG-1103P	GAG-17-37 vs GAG-1103P
VIT_12s0028g03260	nicotianamine aminotransferase A	K11819	vv10966Glucosinolate_biosynthesis	Carbohydrate Metabolic Process	2.63371	3.92398	2.50957
VIT_05s0020g00330	galactinol synthase	E2_4_1_123	vv10052Galactose_metabolism	Carbohydrate Metabolic Process	-2.61756	-3.51722	-2.45802
VIT_03s0038g04530	S-adenosyl-L-methionine:salicylic acid carboxyl methyltransferase		vv10360Phenylalanine_metabolism	Cellular Amino Acids and Derivative Metabolic Process	2.29378	2.36384	2.91194
VIT_03s0063g01820	AOS (ALLENE OXIDE SYNTHASE)	E4_2_1_92	vv10592alpha-Linolenic_acid_metabolism	Lipid Metabolic Process	2.43631	3.7916	2.94678
VIT_08s0040g01200	short-chain type alcohol dehydrogenase			Lipid Metabolic Process	2.95592	2.02903	2.38053
VIT_05s0049g00600	no hit			no hit	2.17918	2.36193	3.02858
VIT_05s0077g01570	pathogenesis protein 10 [Vitis vinifera]			Response to Stress	2.75142	2.27418	2.16267
VIT_01s0011g06440	chalcone reductase		vv10941Flavonoid_biosynthesis	Secondary Metabolic Process	3.08928	2.31698	3.23573
VIT_16s0148g00370	receptor serine/threonine kinase			Signal Transduction	2.11879	3.63268	2.15092
VIT_16s0050g01880	receptor kinase homolog LRK10			Signal Transduction	-2.98224	-2.63913	-2.16311

## Sheet: KOB_41B_17-37_common DEGs
					log2 (Fold change)
gene_id	Gene Annotation	EC or Kegg ID	Network	Functional Cathegory	GAG-KOB vs GAG-1103P	GAG-41B vs GAG-1103P	GAG-17-37 vs GAG-1103P
VIT_11s0149g00380	chitinase-3 protein 1 precursor	E3_2_1_14	vv10530Aminosugars_metabolism	Carbohydrate Metabolic Process	2.25896	2.25647	2.01519
VIT_16s0050g02210	chitinase III [Vitis vinifera]	E3_2_1_14	vv10530Aminosugars_metabolism	Carbohydrate Metabolic Process	-2.27644	-2.80331	-2.24469
VIT_05s0020g02200	inosine-uridine preferring nucleoside hydrolase	E3_2_2_1	vv10230Purine_metabolism vv10760Nicotinate_and_nicotinamide_metabolism	Cellular Amino Acids and Derivative Metabolic Process	2.88967	4.0848	2.01414
VIT_08s0007g02810	Regulator of the ATPase vacuolar RAV2	RAV2	vv60001ABI3VP1	DNA/RNA Metabolic Process	2.88104	4.27553	2.05809
VIT_05s0094g00160	no hit			no hit	3.17949	6.18218	2.04622
VIT_08s0007g08740	no hit			no hit	2.83126	4.2014	2.21883
VIT_15s0021g01630	ETHYLENE RESPONSIVE ELEMENT BINDING FACTOR 2	ERF2_1	vv30008Ethylene_signaling vv60003AP2_EREBP	Response to Hormone Stimulus	2.02427	4.30842	2.0548
VIT_19s0140g00140	GA 20-oxidase 2	E1_14_11_12	vv10904Diterpenoid_biosynthesis	Response to Hormone Stimulus	3.37878	4.97929	2.01887
VIT_01s0010g02020	peroxidase (EC 1.11.1.7), anionic	E1_11_1_7	vv10360Phenylalanine_metabolism vv10680Methane_metabolism	Response to Stress	3.06484	2.93402	2.61507
VIT_07s0031g01070	ascorbate oxidase	E1_10_3_3	vv10053Ascorbate_and_aldarate_metabolism vv50109Incompletely_characterized_transport_systems	Response to Stress	2.76629	4.52853	2.00003
VIT_08s0007g08750	heat shock transcription factor B3	HSFB3	vv60037HSF	Response to Stress	2.73977	4.00156	2.23409
VIT_00s0444g00010	laccase	E1_10_3_2	vv11000Single_reactions vv50109Incompletely_characterized_transport_systems	Secondary Metabolic Process	2.28416	3.68412	2.75631
VIT_06s0009g03040	Flavonoid 3',5'-hydroxylase(F3'5'H)	E1_14_13_88	vv10941Flavonoid_biosynthesis	Secondary Metabolic Process	2.84934	3.9234	2.2907
VIT_08s0058g00790	secoisolariciresinol dehydrogenase	SIRD	vv10940Phenylpropanoid_biosynthesis	Secondary Metabolic Process	2.55432	4.69966	2.51831
VIT_14s0068g00920	chalcone synthase 2	E2_3_1_74	vv10941Flavonoid_biosynthesis	Secondary Metabolic Process	3.73747	4.35156	2.52008
VIT_16s0050g00480	CYP715A1			Secondary Metabolic Process	2.05942	6.18379	2.28823
VIT_18s0001g00730	laccase	E1_10_3_2	vv11000Single_reactions vv50109Incompletely_characterized_transport_systems	Secondary Metabolic Process	3.41331	5.35897	3.02871
VIT_18s0001g00790	laccase	E1_10_3_2	vv11000Single_reactions vv50109Incompletely_characterized_transport_systems	Secondary Metabolic Process	3.94227	5.68872	3.38774
VIT_18s0001g00850	laccase	E1_10_3_2	vv11000Single_reactions vv50109Incompletely_characterized_transport_systems	Secondary Metabolic Process	2.59897	3.83936	2.65018
VIT_18s0075g00580	laccase	E1_10_3_2	vv11000Single_reactions vv50109Incompletely_characterized_transport_systems	Secondary Metabolic Process	2.47956	2.96879	2.27497
VIT_18s0075g00590	laccase	E1_10_3_2	vv11000Single_reactions vv50109Incompletely_characterized_transport_systems	Secondary Metabolic Process	3.14854	3.76412	2.62514
VIT_18s0075g00600	laccase	E1_10_3_2	vv11000Single_reactions vv50109Incompletely_characterized_transport_systems	Secondary Metabolic Process	2.78117	3.00934	2.17801
VIT_18s0075g00620	laccase	E1_10_3_2	vv11000Single_reactions vv50109Incompletely_characterized_transport_systems	Secondary Metabolic Process	3.43854	4.0214	3.13716
VIT_18s0117g00590	laccase	E1_10_3_2	vv11000Single_reactions vv50109Incompletely_characterized_transport_systems	Secondary Metabolic Process	3.15161	3.02942	2.80505
VIT_00s0262g00120	receptor kinase RK20-1			Signal Transduction	3.48317	3.97659	2.57454
VIT_01s0011g03650	Map kinase substrate 1 MKS1			Signal Transduction	2.17127	5.01265	2.19005
VIT_08s0007g06610	lectin protein kinase			Signal Transduction	3.47563	6.40921	2.81265
VIT_09s0002g02760	FRK1 (FLG22-INDUCED RECEPTOR-LIKE KINASE 1)	FRK1	vv34626Plant-pathogen_interaction	Signal Transduction	3.32603	6.2357	2.26458
VIT_03s0017g01300	ABC transporter G member 7	ABCG7	vv52010ABC_transporters	Transport	4.91842	4.86882	2.99569
VIT_05s0020g03140	SUGAR TRANSPORTER 13	STP13	vv50121Porters_cat_1_to_6	Transport	3.01444	4.66382	2.12294
VIT_07s0104g01730	HAK5 (High affinity K+ transporter 5)	HAK5	vv50125Porters_cat_66_to_94	Transport	2.89688	3.65575	2.13439
VIT_08s0007g00030	Cation/hydrogen exchanger 20 (CHX20)	CHX20	vv50124Porters_cat_30_to_64	Transport	2.65252	3.16401	2.07602
VIT_14s0066g02100	AAA-type ATPase			Transport	3.44058	6.40071	2.94034
VIT_07s0129g01010	unknown			unknown	2.90985	6.03221	2.08025

## Sheet: KOB_3309C_17-37_common DEGs
					log2 (Fold change)
gene_id	Gene Annotation	EC or Kegg ID	Network	Functional Cathegory	GAG-KOB vs GAG-1103P	GAG-3309C vs GAG-1103P	GAG-17-37 vs GAG-1103P
VIT_06s0061g00100	glucan endo-1,3-beta-glucosidase, acidic isoform precursor	E3_2_1_39	vv10500Starch_and_sucrose_metabolism	Carbohydrate Metabolic Process	2.3973	3.55467	3.08361
VIT_06s0061g00120	beta-1,3-glucanase [Vitis riparia]	E3_2_1_6		Carbohydrate Metabolic Process	2.00009	3.16904	2.70446
VIT_17s0000g01290	RGP1 (REVERSIBLY GLYCOSYLATED POLYPEPTIDE 1)	E2_4_1_186	vv10052Galactose_metabolism	Carbohydrate Metabolic Process	3.10595	2.70788	2.31826
VIT_04s0023g01600	Membrane protein			Cellular Process	2.12674	2.63067	2.80707
VIT_00s0301g00120	late embryogenesis abundant protein			Developmental Process	3.78437	4.7546	4.4714
VIT_04s0008g07080	chloroplast nucleoid DNA-binding protein			DNA/RNA Metabolic Process	2.73176	3.21837	3.22133
VIT_00s0256g00130	no hit			no hit	2.31515	2.52385	2.44076
VIT_18s0001g11070	no hit			no hit	2.51838	2.96498	3.86918
VIT_18s0001g00680	Laccase	E1_10_3_2	vv11000Single_reactions vv50109Incompletely_characterized_transport_systems	Secondary Metabolic Process	3.16565	3.39374	3.24996
VIT_08s0058g01030	saposin B domain-containing protein	SAPB	vv50101Channels_and_pores	Transport	2.33649	2.69566	2.85939
VIT_00s0802g00020	Unknown protein			unknown	2.66183	2.95499	2.56977
VIT_19s0090g00510	unknown protein			unknown	2.30449	2.0156	2.62204
VIT_00s0265g00090	unknown protein			unknown	-3.83695	-3.53903	-3.31127

## Sheet: KOB_3309C_41B_common DEGs
					log2 (Fold change)
gene_id	Gene Annotation	EC or Kegg ID	Network	Functional Cathegory	GAG-KOB vs GAG-1103P	GAG-3309C vs GAG-1103P	GAG-41B vs GAG-1103P
VIT_03s0063g00430	alpha-amylase / 1,4-alpha-D-glucan glucanohydrolase	E3_2_1_1	vv10500Starch_and_sucrose_metabolism	Carbohydrate Metabolic Process	2.768	2.2696	3.81387
VIT_05s0094g00220	Chitinase class IV	E3_2_1_14	vv10530Aminosugars_metabolism	Carbohydrate Metabolic Process	3.59759	2.02675	4.95626
VIT_06s0004g05660	glycosyl transferase family 1 protein			Carbohydrate Metabolic Process	2.39066	2.15347	2.24784
VIT_08s0007g05430	pyruvate kinase	E2_7_1_40	vv10010Glycolysis vv10230Purine_metabolism vv10620Pyruvate_metabolism vv10710Carbon_fixation	Carbohydrate Metabolic Process	2.1572	2.18956	2.22556
VIT_08s0007g05490	Pyruvate kinase	E2_7_1_40	vv10010Glycolysis vv10230Purine_metabolism vv10620Pyruvate_metabolism vv10710Carbon_fixation	Carbohydrate Metabolic Process	2.06058	2.33134	2.30989
VIT_10s0116g00760	glucose-6-phosphate/phosphate translocator	GPT2	vv50122Porters_cat_7_to_17	Carbohydrate Metabolic Process	3.11835	2.34957	6.65431
VIT_09s0002g02120	beta-galactosidase	E3_2_1_23	vv10052Galactose_metabolism vv10511N-Glycan_degradation vv10600Sphingolipid_metabolism	Carbohydrate Metabolic Process	-2.14536	-2.05385	-2.45446
VIT_12s0134g00160	Xyloglucan endotransglycosylase/hydrolase 16	E2_4_1_207	vv40006Cell_wall	Cell Wall Metabolism	2.51171	2.11525	4.06854
VIT_04s0023g02310	S-adenosyl-L-methionine:salicylic acid methyltransferase	SAMTBSCMT	vv10360Phenylalanine_metabolism	Cellular Amino Acids and Derivative Metabolic Process	4.4803	3.33801	4.9425
VIT_10s0116g00710	tryptophan synthase, beta subunit	E4_2_1_20	vv10400Phenylalanine_tyrosine_and_tryptophan_biosynthesis	Cellular Amino Acids and Derivative Metabolic Process	3.1072	2.99563	6.88467
VIT_14s0083g00520	proline oxidase	E1_5_99_8	vv10330Arginine_and_proline_metabolism	Cellular Amino Acids and Derivative Metabolic Process	2.73294	2.09161	3.99945
VIT_18s0001g12900	S-adenosyl-L-methionine:salicylic acid carboxyl methyltransferase	SAMTBSCMT	vv10360Phenylalanine_metabolism	Cellular Amino Acids and Derivative Metabolic Process	3.40005	2.43939	7.18304
VIT_04s0008g07150	aspartyl protease	E3_4_23_x		Cellular Homeostasis	3.28678	2.94403	6.15886
VIT_04s0008g07250	aspartyl protease	E3_4_23_x		Cellular Homeostasis	3.20546	2.65871	5.74461
VIT_03s0038g02110	co-chaperone-curved DNA binding protein A	K05516	vv50132Primary_active_transporter_cat_A5_to_A8	Cellular Homeostasis	-2.99928	-2.44447	-5.27503
VIT_01s0011g06640	Beta-Ig-H3/fasciclin			Cellular Process	2.65694	2.17957	3.58834
VIT_12s0059g00160	ankyrin repeat	K10380	vv50108Accessory_factors_involved_in_transport	Cellular Process	3.03315	2.19862	5.55825
VIT_14s0066g01970	metalloendoproteinase 1 precursor			Cellular Process	2.95552	2.69662	2.0735
VIT_16s0013g00210	metacaspase 1			Cellular Process	2.22808	2.3368	3.52491
VIT_04s0008g07130	Chloroplast nucleoid DNA binding protein			DNA/RNA Metabolic Process	2.37095	3.05203	6.26775
VIT_04s0008g07140	Chloroplast nucleoid DNA binding protein			DNA/RNA Metabolic Process	2.50076	2.80165	4.60876
VIT_00s0250g00090	oxidoreductase, 2OG-Fe(II) oxygenase			Generation of Energy	3.23845	3.18109	3.51572
VIT_02s0154g00160	flavin-containing monooxygenase family protein / FMO family protein	E1_14_13_8	vv11000Single_reactions	Generation of Energy	2.2595	2.68241	3.82098
VIT_07s0141g00360	lipase class 3			Lipid Metabolic Process	2.98706	2.03988	5.54216
VIT_13s0084g00130	CXE carboxylesterase	E3_1_1_1		Lipid Metabolic Process	2.59848	2.15865	4.85996
VIT_14s0083g00110	Allene oxide cyclase	E5_3_99_6	vv10592alpha-Linolenic_acid_metabolism	Lipid Metabolic Process	2.29762	2.25912	3.23957
VIT_18s0001g11630	Allene oxide synthase	E4_2_1_92	vv10592alpha-Linolenic_acid_metabolism	Lipid Metabolic Process	2.18393	2.23844	3.22985
VIT_04s0008g04710	beta-ketoacyl-CoA synthase	E2_3_1_41	vv10061Fatty_acid_biosynthesis	Lipid Metabolic Process	-3.04502	-2.38767	-3.97447
VIT_01s0011g01810	no hit			no hit	2.68856	2.08599	4.27282
VIT_07s0005g02070	no hit			no hit	2.87061	2.53562	4.37222
VIT_08s0007g05840	no hit			no hit	2.05403	2.3089	5.09921
VIT_11s0016g04330	no hit			no hit	2.45461	2.58923	3.10094
VIT_13s0019g03520	no hit			no hit	2.30027	2.70323	3.56472
VIT_14s0081g00190	no hit			no hit	3.43064	2.80977	5.99198
VIT_19s0090g01360	no hit			no hit	-2.20561	-2.42199	-3.05546
VIT_01s0146g00480	TIFY 9 (Jasmonate ZIM domain-containing protein 10)	JAZ10	vv30011Jasmonate_signaling vv60069ZIM	Response to Hormone Stimulus	3.01394	2.26346	5.6025
VIT_07s0005g03200	Ethylene-responsive transcription factor ERF098	ERF098_3	vv30008Ethylene_signaling vv60003AP2_EREBP	Response to Hormone Stimulus	3.1572	2.22149	5.38483
VIT_10s0003g02620	AWPM19	AWPM19	vv30001ABA_signaling	Response to Hormone Stimulus	2.71277	2.70314	3.05906
VIT_10s0003g03800	Jasmonate ZIM domain-containing protein 8	JAZ8_1	vv30011Jasmonate_signaling vv60069ZIM	Response to Hormone Stimulus	2.6722	2.0625	7.2666
VIT_18s0001g12890	jasmonate O-methyltransferase	E2_1_1_141	vv10592alpha-Linolenic_acid_metabolism	Response to Hormone Stimulus	2.69487	2.24504	7.05938
VIT_18s0041g02070	12-oxophytodienoate reductase 1	E1_3_1_42	vv10592alpha-Linolenic_acid_metabolism	Response to Hormone Stimulus	2.68342	2.9745	5.84103
VIT_01s0026g02620	expansin [Vitis labrusca x Vitis vinifera] EXPA15	EXPA15	vv30003Auxin_signaling	Response to Hormone Stimulus	-4.45892	-3.67708	-5.81135
VIT_02s0087g00930	9-cis-epoxycarotenoid dioxygenase	E1_13_11_51	vv10906Carotenoid_biosynthesis vv11013ABA_biosynthesis vv30001ABA_signaling	Response to Hormone Stimulus	-2.56643	-2.00672	-4.89091
VIT_18s0001g06690	gibberellin 20 oxidase 2	E1_14_11_12	vv10904Diterpenoid_biosynthesis	Response to Hormone Stimulus	-2.05034	-2.28507	-3.87814
VIT_01s0010g02970	Calcium-binding EF-hand	K13448	vv34626Plant-pathogen_interaction	Response to Stress	3.29418	2.4494	5.48163
VIT_01s0010g03210	HcrVf1 protein			Response to Stress	2.76158	2.31254	3.77071
VIT_02s0025g04250	Osmotin			Response to Stress	2.36875	2.57486	4.26119
VIT_02s0025g04260	osmotin [Vitis vinifera]			Response to Stress	2.29094	2.60023	4.2643
VIT_02s0025g04310	Thaumatin			Response to Stress	2.5134	2.86731	2.15629
VIT_02s0025g04330	Thaumatin VVTL1 [Vitis vinifera]			Response to Stress	2.29169	2.37171	2.78496
VIT_06s0004g01020	Dirigent protein			Response to Stress	3.23292	2.60441	5.17069
VIT_08s0056g00290	Calcium-binding allergen Bet v 3 (Bet v III)	K13448	vv34626Plant-pathogen_interaction	Response to Stress	2.08186	2.05765	3.35301
VIT_14s0060g02320	respiratory burst oxidase protein B (ATRBOHB)	RBOHB	vv34626Plant-pathogen_interaction vv50105Transport_electron_carriers	Response to Stress	2.6708	2.1158	4.91073
VIT_16s0050g00200	HcrVf3 protein	K13466	vv34626Plant-pathogen_interaction	Response to Stress	3.0464	2.12865	3.6737
VIT_17s0000g04880	Dirigent protein			Response to Stress	2.69525	2.09963	4.59773
VIT_08s0105g00380	Leucoanthocyanidin dioxygenase	E1_14_11_19	vv10941Flavonoid_biosynthesis	Secondary Metabolic Process	2.92357	2.02907	2.70314
VIT_11s0016g01660	phenylalanine ammonia-lyase	E4_3_1_5	vv10350Tyrosine_metabolism vv10360Phenylalanine_metabolism vv10910Nitrogen_metabolism vv10940Phenylpropanoid_biosynthesis	Secondary Metabolic Process	2.41941	3.297	3.22403
VIT_11s0065g00130	taxane 10-beta-hydroxylase	E1_14_13_76	vv10904Diterpenoid_biosynthesis	Secondary Metabolic Process	2.45483	2.00511	3.53377
VIT_11s0065g00350	trans-cinnamate 4-monooxygenase	E1_14_13_11	vv10360Phenylalanine_metabolism vv10940Phenylpropanoid_biosynthesis	Secondary Metabolic Process	2.74927	2.75743	3.90202
VIT_12s0028g01880	isoflavone methyltransferase/ Orcinol O-methyltransferase 1 oomt1	E2_1_1_46	vv10943Isoflavonoid_biosynthesis	Secondary Metabolic Process	2.63802	3.05256	5.37595
VIT_12s0028g01940	isoflavone methyltransferase/ Orcinol O-methyltransferase 1 oomt1	E2_1_1_46	vv10943Isoflavonoid_biosynthesis	Secondary Metabolic Process	2.85361	3.00502	5.36659
VIT_16s0039g01110	phenylalanin ammonia-lyase [Vitis vinifera]	E4_3_1_5	vv10350Tyrosine_metabolism vv10360Phenylalanine_metabolism vv10910Nitrogen_metabolism vv10940Phenylpropanoid_biosynthesis	Secondary Metabolic Process	3.28091	2.29398	6.12914
VIT_16s0098g00860	Flavanone 3-hydroxylase	E1_14_11_9	vv10941Flavonoid_biosynthesis	Secondary Metabolic Process	2.59368	2.85224	3.18117
VIT_17s0000g06130	glutathione S-transferase 9 GSTU9	E2_5_1_18_GSTU9	vv10480Glutathione_metabolism	Secondary Metabolic Process	2.19383	2.39878	2.79301
VIT_18s0001g00030	CYP87A2			Secondary Metabolic Process	2.63973	2.36595	3.9014
VIT_18s0122g00690	laccase	E1_10_3_2	vv11000Single_reactions vv50109Incompletely_characterized_transport_systems	Secondary Metabolic Process	2.00637	2.00305	4.40346
VIT_00s2485g00010	CRK10 (CYSTEINE-RICH RLK10)			Signal Transduction	2.18019	2.07005	2.89173
VIT_03s0017g01550	CRK10 (CYSTEINE-RICH RLK10)			Signal Transduction	2.93508	2.52898	2.48762
VIT_03s0038g04170	lectin protein kinase			Signal Transduction	3.0039	2.65642	6.4512
VIT_04s0008g00300	CLAVATA1 receptor kinase (CLV1)			Signal Transduction	2.59813	2.49342	3.68395
VIT_04s0008g00310	CLAVATA1 receptor kinase (CLV1)			Signal Transduction	2.22768	2.44305	3.48894
VIT_04s0008g00370	CLAVATA1 receptor kinase (CLV1)			Signal Transduction	2.22122	2.8126	4.30989
VIT_04s0044g00650	S-receptor kinase			Signal Transduction	2.70791	2.14903	3.71035
VIT_04s0044g00680	S-receptor kinase			Signal Transduction	2.87091	2.51502	3.87479
VIT_09s0002g07570	leucine-rich repeat protein kinase			Signal Transduction	2.2519	2.61552	3.56368
VIT_09s0002g07830	leucine-rich repeat protein kinase			Signal Transduction	2.29508	2.50935	3.36647
VIT_10s0092g00570	leucine-rich repeat family			Signal Transduction	2.43966	2.09196	2.94635
VIT_11s0016g03080	CLAVATA1 receptor kinase (CLV1)			Signal Transduction	2.62378	2.26511	3.56524
VIT_13s0156g00570	S-receptor kinase			Signal Transduction	2.69024	2.14722	3.10405
VIT_18s0001g01370	Wall-associated receptor kinase 5			Signal Transduction	3.37134	3.47785	4.42545
VIT_18s0041g00010	Wall-associated receptor kinase 2			Signal Transduction	2.89094	3.07286	5.77948
VIT_18s0041g00030	Wall-associated receptor kinase 5			Signal Transduction	2.75471	2.75708	3.61392
VIT_18s0041g00040	Wall-associated receptor kinase 2			Signal Transduction	2.92773	2.84365	3.79821
VIT_19s0014g04080	serine/threonine-protein kinase receptor ARK3			Signal Transduction	2.31238	2.10703	3.48065
VIT_19s0014g04190	ARK3 (Arabidopsis Receptor Kinase 3)			Signal Transduction	2.4169	2.31076	2.95839
VIT_19s0014g04380	ARK3 (Arabidopsis Receptor Kinase 3)			Signal Transduction	3.28306	3.21422	4.19386
VIT_06s0004g04970	scarecrow transcription factor 14 (SCL14)	SCL14_4	vv60032GRAS	Transcription Factor Activity	2.9772	3.1639	4.77411
VIT_07s0031g01710	WRKY DNA-binding protein 51	WRKY51_3	vv60066WRKY	Transcription Factor Activity	2.41922	2.13056	4.34457
VIT_08s0007g06670	homeobox-leucine zipper protein 14	HAT14_1	vv60034HB	Transcription Factor Activity	2.47986	2.26433	4.55707
VIT_11s0016g02780	myb domain protein 68	MYB68_1	vv60044MYB	Transcription Factor Activity	2.11409	2.38132	3.4189
VIT_16s0050g02510	WRKY DNA-binding protein 53	WRKY53_1	vv60066WRKY	Transcription Factor Activity	3.07759	2.02752	4.90616
VIT_19s0027g00860	NAC domain-containing protein 42	NAC042_2	vv60046NAC	Transcription Factor Activity	2.9908	2.10081	3.99259
VIT_07s0005g03080	nodulin MtN21 family	MTN21	vv50122Porters_cat_7_to_17	Transport	3.02888	3.29126	2.93149
VIT_08s0007g01310	proton-dependent oligopeptide transport (POT) family protein	POT	vv50122Porters_cat_7_to_17	Transport	2.65966	2.01553	2.78082
VIT_08s0007g01320	proton-dependent oligopeptide transport (POT) family protein	POT	vv50122Porters_cat_7_to_17	Transport	2.59454	2.09779	2.75393
VIT_09s0002g04720	coatomer protein complex, subunit beta 2	COPB2	vv50110Protein_coat	Transport	2.44815	2.29297	3.73401
VIT_14s0030g02110	Ca2+-transporting ATPase type 2 ISOFORM 8	K01537	vv34020Calcium_signaling_pathway vv50131Primary_active_transporter_cat_A2_to_A4	Transport	2.01332	2.96699	2.98795
VIT_14s0066g02080	AAA-type ATPase family protein			Transport	2.19869	2.41807	4.8921
VIT_14s0068g01250	mitochondrial phosphate transporter	MPHOSPTR	vv50123Porters_cat_18_to_29	Transport	3.00285	2.61369	4.18916
VIT_19s0014g01730	glutamate receptor 2.8	GLR2_8	vv50101Channels_and_pores	Transport	2.72074	2.62984	4.8989
VIT_09s0002g01310	Unknown protein			unknown	3.45946	2.72546	4.59202
VIT_14s0006g03050	Unknown protein			unknown	2.58201	2.0709	3.11784
VIT_16s0050g01890	unknown			unknown	3.03936	2.26118	5.57249
VIT_17s0000g03420	Unknown protein			unknown	2.45051	2.15024	5.01558
VIT_04s0023g01110	PQ-loop repeat protein			unknown	-2.32303	-3.32675	-2.89152

## Sheet: KOB_41B_common DEGs
					log2 (Fold change)
gene_id	Gene Annotation	EC or Kegg ID	Network	Functional Cathegory	GAG-KOB vs GAG-1103P	GAG-41B vs GAG-1103P
VIT_00s0220g00180	glycosyl hydrolase family 20 protein			Carbohydrate Metabolic Process	2.06102	3.88768
VIT_00s0340g00040	beta-hexosaminidase beta chain precursor	E3_2_1_52	vv10511N-Glycan_degradation vv10530Aminosugars_metabolism	Carbohydrate Metabolic Process	2.47176	4.23848
VIT_00s0406g00010	beta-hexosaminidase beta chain precursor	E3_2_1_52	vv10511N-Glycan_degradation vv10530Aminosugars_metabolism	Carbohydrate Metabolic Process	2.61207	4.26305
VIT_01s0011g00690	UDP-glucose 6-dehydrogenase	E1_1_1_22	vv10040Pentose_glucuronate_interconversion vv10500Starch_and_sucrose_metabolism vv10520Nucleotide_sugars_metabolism vv40006Cell_wall	Carbohydrate Metabolic Process	2.3372	3.46018
VIT_02s0087g00330	glycosyl transferase family 1 protein			Carbohydrate Metabolic Process	2.29904	3.99217
VIT_05s0094g00320	Chitinase, class IV [Vitis vinifera]	E3_2_1_14	vv10530Aminosugars_metabolism	Carbohydrate Metabolic Process	2.25765	3.73756
VIT_06s0061g00280	2-phosphoglycerate kinase	K05715	vv10010Glycolysis	Carbohydrate Metabolic Process	2.13558	2.82724
VIT_07s0005g02560	chitinase Class I	E3_2_1_14	vv10530Aminosugars_metabolism	Carbohydrate Metabolic Process	2.33243	3.60341
VIT_14s0083g01100	alpha-1,4-glucan-protein synthase 1	E2_4_1_113	vv10500Starch_and_sucrose_metabolism	Carbohydrate Metabolic Process	2.40055	2.69042
VIT_15s0046g01570	acidic endochitinase (CHIB1)	E3_2_1_14	vv10530Aminosugars_metabolism	Carbohydrate Metabolic Process	2.92293	3.61538
VIT_17s0000g03230	Alpha-mannosidase	E3_2_1_113	vv10510N-Glycan_biosynthesis vv11030Glycan_structures-biosynthesis1 vv24141Protein_processing_in_endoplasmic_reticulum	Carbohydrate Metabolic Process	2.33448	3.7785
VIT_01s0137g00710	alpha-L-fucosidase 2 precursor	E3_2_1_51	vv10511N-Glycan_degradation	Carbohydrate Metabolic Process	-2.01668	-3.75694
VIT_05s0062g01010	aldo/keto reductase AKR	E1_1_1_21	vv10040Pentose_glucuronate_interconversion vv10051Fructose_and_mannose_metabolism vv10052Galactose_metabolism vv10561Glycerolipid_metabolism vv10620Pyruvate_metabolism	Carbohydrate Metabolic Process	-2.40456	-4.03486
VIT_07s0289g00080	UDP-glucose:salicylic acid glucosyltransferase	E2_4_1_35	vv10500Starch_and_sucrose_metabolism	Carbohydrate Metabolic Process	-2.91275	-3.40234
VIT_17s0000g05870	aldose 1-epimerase protein	E5_1_3_3	vv10010Glycolysis	Carbohydrate Metabolic Process	-3.0173	-2.30457
VIT_00s0480g00020	hydroxyproline-rich glycoprotein family protein			Cell Wall Metabolism	2.25355	2.61546
VIT_00s0531g00060	cellulose synthase CSLE1	E2_4_1_12_CSLE1	vv40006Cell_wall	Cell Wall Metabolism	2.24188	2.80591
VIT_04s0023g01120	Galacturonosyltransferase	E2_4_1_43	vv40006Cell_wall	Cell Wall Metabolism	2.11896	4.12269
VIT_16s0022g00700	pectinesterase family	E3_1_1_11	vv40006Cell_wall	Cell Wall Metabolism	2.15107	3.34951
VIT_17s0000g05740	Pectate lyase, N-terminal	E4_2_2_2	vv40006Cell_wall	Cell Wall Metabolism	2.16818	3.86042
VIT_00s0469g00050	cellulose synthase CSLE1	E2_4_1_12_CSLE1	vv40006Cell_wall	Cell Wall Metabolism	-2.08169	-3.37692
VIT_00s0391g00070	3-deoxy-D-arabino-heptulosonate 7-phosphate synthase	E2_5_1_54	vv10400Phenylalanine_tyrosine_and_tryptophan_biosynthesis	Cellular Amino Acids and Derivative Metabolic Process	2.06656	3.28493
VIT_01s0011g06600	glutamate decarboxylase	E4_1_1_15	vv10251Glutamate_metabolism vv10252Alanine_and_aspartate_metabolism vv10272Cysteine_metabolism vv10410Beta-alanine_metabolism vv10650Butanoate_metabolism	Cellular Amino Acids and Derivative Metabolic Process	2.57601	4.32996
VIT_01s0137g00670	QUINOLINATE SYNTHASE	K03517	vv10760Nicotinate_and_nicotinamide_metabolism	Cellular Amino Acids and Derivative Metabolic Process	2.22193	2.72258
VIT_04s0023g02230	S-adenosyl-L-methionine:salicylic acid carboxyl methyltransferase	SAMTBSCMT	vv10360Phenylalanine_metabolism	Cellular Amino Acids and Derivative Metabolic Process	3.24993	2.48252
VIT_04s0023g02240	S-adenosyl-L-methionine:salicylic acid carboxyl methyltransferase	SAMTBSCMT	vv10360Phenylalanine_metabolism	Cellular Amino Acids and Derivative Metabolic Process	2.37036	2.51684
VIT_04s0023g02260	S-adenosyl-L-methionine:salicylic acid carboxyl methyltransferase	SAMTBSCMT	vv10360Phenylalanine_metabolism	Cellular Amino Acids and Derivative Metabolic Process	2.42025	2.7406
VIT_07s0005g01310	Threonyl-tRNA synthetase, class IIa	E6_1_1_3	vv10260Glycine_serine_and_threonine_metabolism vv20970Aminoacyl-tRNA_biosynthesis	Cellular Amino Acids and Derivative Metabolic Process	2.19568	4.63629
VIT_07s0005g05780	pantoate--beta-alanine ligase	E6_3_2_1	vv10410Beta-alanine_metabolism vv10770Pantothenate_and_CoA_biosynthesis	Cellular Amino Acids and Derivative Metabolic Process	2.27242	4.32121
VIT_10s0116g01650	5'-adenylylsulfate reductase (APR1)	E1_8_4_8	vv10920Sulfur_metabolism	Cellular Amino Acids and Derivative Metabolic Process	2.42933	3.58479
VIT_18s0001g06250	3-deoxy-D-arabino-heptulosonate 7-phosphate synthase	E2_5_1_54	vv10400Phenylalanine_tyrosine_and_tryptophan_biosynthesis	Cellular Amino Acids and Derivative Metabolic Process	2.29594	3.33839
VIT_01s0011g06460	deoxymugineic acid synthase	DMAS	vv10271Methionine_metabolism	Cellular Amino Acids and Derivative Metabolic Process	-2.31298	-3.23686
VIT_03s0038g01420	phytochelatin synthetase	E2_3_2_15	vv10251Glutamate_metabolism	Cellular Amino Acids and Derivative Metabolic Process	-2.21252	-2.33861
VIT_06s0009g00370	U-box domain-containing protein			Cellular Homeostasis	2.34655	3.17342
VIT_07s0141g00840	33 kDa secretory protein			Cellular Homeostasis	2.62728	3.0182
VIT_08s0040g01060	serine carboxypeptidase S10			Cellular Homeostasis	3.21908	5.29953
VIT_08s0040g01110	serine carboxypeptidase II			Cellular Homeostasis	2.31237	3.94309
VIT_08s0105g00180	U-box domain-containing protein			Cellular Homeostasis	2.6308	4.15141
VIT_08s0105g00190	U-box domain-containing protein			Cellular Homeostasis	2.49523	4.2891
VIT_09s0054g00900	chaperone BCS1 mitochondrial	K08900		Cellular Homeostasis	2.36439	4.09681
VIT_09s0054g00910	chaperone BCS1 mitochondrial	K08900		Cellular Homeostasis	2.11475	3.35788
VIT_13s0084g00820	pepsin A			Cellular Homeostasis	2.09505	2.04337
VIT_14s0068g00670	heavy-metal-associated domain-containing protein / copper chaperone (CCH)			Cellular Homeostasis	3.05801	4.54231
VIT_15s0048g02070	BON2-associated protein (BAP2)			Cellular Homeostasis	2.38362	4.35103
VIT_18s0166g00190	U-box domain-containing protein			Cellular Homeostasis	2.12895	4.26157
VIT_16s0013g02090	F-box family protein			Cellular Homeostasis	-2.07734	-2.38566
VIT_00s0229g00090	matrix metalloproteinase			Cellular Process	2.03954	3.05049
VIT_00s0459g00020	Metalloprotease			Cellular Process	2.39111	3.08938
VIT_00s2648g00010	FAD-dependent pyridine nucleotide-disulphide oxidoreductase			Cellular Process	2.04122	3.22598
VIT_01s0026g00900	metalloendoproteinase 1 precursor			Cellular Process	2.06086	3.73358
VIT_01s0026g01190	CW14			Cellular Process	2.09492	2.54041
VIT_03s0091g00160	NtPRp27 secretory protein			Cellular Process	2.3891	2.57327
VIT_03s0091g00580	Peroxisomal membrane protein	K13348	vv44146Peroxisome	Cellular Process	2.14721	4.93811
VIT_04s0008g05700	ACT domain-containing protein			Cellular Process	2.31189	4.48349
VIT_04s0044g00220	monooxygenase			Cellular Process	2.64521	4.53508
VIT_04s0044g00270	Monooxygenase (MO3)			Cellular Process	2.08591	4.19943
VIT_09s0002g06890	dicyanin blue copper protein			Cellular Process	2.60766	3.82617
VIT_12s0059g02630	ankyrin repeat protein family	K10380	vv50108Accessory_factors_involved_in_transport	Cellular Process	2.14029	2.56859
VIT_19s0090g01420	Wax synthase isoform 1	E2_3_1_75	vv11000Single_reactions	Cellular Process	2.0125	3.05552
VIT_19s0090g01800	armadillo/beta-catenin repeat			Cellular Process	2.65115	2.61177
VIT_00s1364g00020	EMB1674 (EMBRYO DEFECTIVE 1674) kinase interacting family protein	EMB1674_3	vv60087Orphans_KIP1_SANTA	Developmental Process	2.03096	2.98753
VIT_01s0011g02680	Myb-related protein 3R-1 (Plant c-MYB-like protein 1) MYB3R1	MYB3R1_5	vv44110Cell_cycle vv60044MYB	Developmental Process	3.1997	4.82921
VIT_05s0051g00050	Myosin-like protein XIB	MYOSINXIB	vv44810Regulation_of_actin_cytoskeleton	Developmental Process	2.18916	2.9106
VIT_06s0004g07030	MRH1 (morphogenesis of root hair 1)			Developmental Process	2.44585	5.66668
VIT_08s0007g05580	embryo-abundant protein			Developmental Process	2.45415	4.43851
VIT_10s0003g02280	SRG1 (SENESCENCE-RELATED GENE 1) oxidoreductase			Developmental Process	3.0946	3.66118
VIT_19s0014g02850	Dynein light subunit lc6, flagellar outer arm	K10418	vv44810Regulation_of_actin_cytoskeleton	Developmental Process	2.56877	3.31611
VIT_00s0125g00290	lateral organ boundaries domain protein 4 (LBD4)	LBD4_2	vv60007AS2	Developmental Process	-2.38771	-4.14179
VIT_01s0011g03440	DNA mismatch repair protein			DNA/RNA Metabolic Process	2.90528	4.41939
VIT_07s0005g01430	PROLIFERA protein	K02210	vv23030DNA_replication vv44110Cell_cycle	DNA/RNA Metabolic Process	2.08803	3.00828
VIT_08s0032g00760	eukaryotic translation initiation factor 2B family protein, putative, expressed	K03238	vv23013RNA_transport	DNA/RNA Metabolic Process	2.28985	3.15334
VIT_00s0753g00020	histone H2A.4 HTA12	H2A4		DNA/RNA Metabolic Process	-2.02614	-3.55796
VIT_00s2376g00010	NADH dehydrogenase, putative	K03885	vv10190Oxidative_phosphorylation vv50134Primary_active_transporter_cat_D1	Generation of Energy	2.06532	3.23208
VIT_08s0007g01560	photoassimilate-responsive protein			Generation of Energy	2.82872	4.68392
VIT_09s0002g08460	8-amino-7-oxononanoate synthase	E2_3_1_47	vv10780Biotin_metabolism	Generation of Energy	2.33047	3.71115
VIT_00s0620g00010	triacylglycerol lipase	E3_1_1_3	vv10561Glycerolipid_metabolism	Lipid Metabolic Process	2.26701	4.99368
VIT_04s0079g00790	Acyl-CoA synthetases (Acyl-activating enzyme 11)	E6_2_1_3	vv10071Fatty_acid_metabolism vv50104Group_translocators	Lipid Metabolic Process	2.14776	3.39805
VIT_06s0004g01580	lipoxygenase	E1_13_11_12	vv10592alpha-Linolenic_acid_metabolism	Lipid Metabolic Process	2.10393	4.29066
VIT_08s0007g07140	esterase/lipase/thioesterase family protein			Lipid Metabolic Process	2.08412	2.7437
VIT_08s0040g00960	CXE carboxylesterase	E3_1_1_1		Lipid Metabolic Process	2.3849	2.41687
VIT_09s0002g01080	lipoxygenase	E1_13_11_12	vv10592alpha-Linolenic_acid_metabolism	Lipid Metabolic Process	2.11312	4.33298
VIT_09s0002g06990	phosphatidic acid phosphatase / PAP2	E3_1_3_4	vv10561Glycerolipid_metabolism vv10564Glycerophospholipid_metabolism vv10565Ether_lipid_metabolism vv10600Sphingolipid_metabolism	Lipid Metabolic Process	2.77246	4.85974
VIT_10s0003g04210	lipase class 3			Lipid Metabolic Process	2.95677	3.96796
VIT_13s0067g01120	omega-3 fatty acid desaturase, chloroplast, temperature-sensitive (FAD8)	K10257	vv11040Biosynthesis_of_unsaturated_fatty_acids	Lipid Metabolic Process	2.37479	4.47653
VIT_16s0098g00460	lipase class 3			Lipid Metabolic Process	2.77312	3.22269
VIT_03s0063g01880	Acyl-CoA synthetase	E6_2_1_3_LACS2	vv10071Fatty_acid_metabolism vv44146Peroxisome vv50104Group_translocators	Lipid Metabolic Process	-2.15118	-2.75357
VIT_07s0005g00510	monoglyceride lipase	E3_1_1_23	vv10561Glycerolipid_metabolism	Lipid Metabolic Process	-2.17024	-3.23603
VIT_09s0002g00540	lipase GDSL 1			Lipid Metabolic Process	-2.29665	-4.83547
VIT_00s0187g00060	no hit			no hit	2.18384	2.58833
VIT_01s0010g00760	no hit			no hit	2.91969	4.90449
VIT_01s0011g01350	no hit			no hit	2.13265	3.7316
VIT_02s0033g01390	no hit			no hit	2.30139	4.19931
VIT_03s0017g01450	no hit			no hit	2.09947	4.16534
VIT_05s0020g04990	no hit			no hit	2.31981	4.67004
VIT_09s0002g02970	no hit			no hit	2.42154	2.24511
VIT_09s0054g00110	no hit			no hit	2.55402	4.31152
VIT_12s0055g00380	no hit			no hit	2.31052	2.90841
VIT_12s0059g01580	no hit			no hit	2.48985	4.34212
VIT_12s0059g01720	no hit			no hit	2.47603	4.36073
VIT_13s0019g03530	no hit			no hit	2.48804	5.49482
VIT_14s0068g01270	no hit			no hit	2.06168	3.23262
VIT_15s0046g03420	no hit			no hit	2.18295	3.76026
VIT_15s0048g01050	no hit			no hit	2.45964	2.34971
VIT_16s0039g02890	no hit			no hit	2.33879	2.23805
VIT_17s0000g03780	no hit			no hit	2.00919	2.58242
VIT_18s0001g04640	no hit			no hit	2.18962	4.80128
VIT_18s0001g08350	no hit			no hit	2.14592	2.36052
VIT_18s0001g08760	no hit			no hit	2.03749	2.90155
VIT_18s0166g00070	no hit			no hit	2.28355	4.14559
VIT_18s0166g00260	no hit			no hit	2.34564	3.1431
VIT_19s0085g00610	no hit			no hit	2.58734	2.288
VIT_19s0090g00600	no hit			no hit	2.70087	5.47377
VIT_01s0011g04190	no hit			no hit	-2.04032	-4.28028
VIT_05s0049g00550	no hit			no hit	-2.28353	-4.62041
VIT_05s0049g00740	no hit			no hit	-2.16599	-3.32286
VIT_18s0001g08340	no hit			no hit	-2.03098	-3.58713
VIT_02s0033g01380	alternative oxidase	AOX1D	vv30001ABA_signaling	Response to Hormone Stimulus	3.00799	4.57366
VIT_04s0044g01880	Auxin Efflux Carrier	AUXEFF	vv50004Auxin_transport vv50125Porters_cat_66_to_94	Response to Hormone Stimulus	2.52892	4.95745
VIT_06s0004g04150	auxin-regulated protein	AUXREG	vv30003Auxin_signaling	Response to Hormone Stimulus	2.26406	3.84403
VIT_07s0005g03220	Ethylene-responsive transcription factor ERF098	ERF098_1	vv30008Ethylene_signaling vv60003AP2_EREBP	Response to Hormone Stimulus	3.16941	6.49427
VIT_08s0007g01650	auxin-independent growth promoter			Response to Hormone Stimulus	2.02611	4.14506
VIT_08s0007g04680	expansin EXPA9	EXPA9	vv30003Auxin_signaling	Response to Hormone Stimulus	2.0556	2.30609
VIT_12s0059g01380	1-aminocyclopropane-1-carboxylate oxidase 1	E1_14_17_4	vv10640Propanoate_metabolism vv30008Ethylene_signaling	Response to Hormone Stimulus	2.79413	5.09771
VIT_15s0048g01390	gibberellin receptor GID1L3	GID1C	vv30010Gibberellin_signaling	Response to Hormone Stimulus	2.0266	3.62729
VIT_18s0001g13200	cytokinin dehydrogenase 5 precursor	E1_5_99_12	vv10908Zeatin_biosynthesis	Response to Hormone Stimulus	2.71157	5.4592
VIT_18s0072g00260	Ethylene-responsive transcription factor RELATED TO APETALA2 6	RAP2_6	vv30008Ethylene_signaling vv60003AP2_EREBP	Response to Hormone Stimulus	2.07145	3.01523
VIT_19s0140g00120	gibberellin 2-beta-dioxygenase 1	E1_14_11_13	vv10904Diterpenoid_biosynthesis	Response to Hormone Stimulus	2.67221	4.49815
VIT_04s0023g03600	SEN1 (DARK INDUCIBLE 1)	SEN1	vv30011Jasmonate_signaling	Response to Hormone Stimulus	-2.52329	-4.03991
VIT_05s0020g02630	Isopentenyltransferase	E2_5_1_27	vv10908Zeatin_biosynthesis	Response to Hormone Stimulus	-2.56179	-3.51609
VIT_07s0151g00540	indole-3-acetate beta-glucosyltransferase	E2_4_1_121	vv11002Auxin_biosynthesis	Response to Hormone Stimulus	-2.08444	-2.64604
VIT_00s0160g00090	TIR-NBS-LRR-TIR disease resistance protein			Response to Stress	2.07425	3.53697
VIT_00s0160g00100	disease resistance protein (TIR-NBS-LRR class			Response to Stress	2.39296	3.84089
VIT_00s0160g00110	TIR-NBS-TIR type disease resistance protein			Response to Stress	2.35784	3.63352
VIT_00s0184g00120	TIR-NBS-LRR-TIR disease resistance protein	K13477	vv34627R_proteins_from_Plant-pathogen_interaction	Response to Stress	2.18098	3.40837
VIT_01s0010g02930	calmodulin	K02183	vv34020Calcium_signaling_pathway vv34626Plant-pathogen_interaction	Response to Stress	2.8059	6.09329
VIT_01s0010g02940	calmodulin	K02183	vv34020Calcium_signaling_pathway vv34626Plant-pathogen_interaction	Response to Stress	2.40023	6.26209
VIT_01s0010g02950	Calcium-binding EF-hand	K13448	vv34626Plant-pathogen_interaction	Response to Stress	2.78701	5.53668
VIT_01s0010g03040	Calcium-binding EF-hand	K13448	vv34626Plant-pathogen_interaction	Response to Stress	2.46264	5.25216
VIT_01s0011g06140	Avr9/Cf-9 rapidly elicited protein			Response to Stress	2.00831	4.0958
VIT_01s0026g01200	disease resistance protein			Response to Stress	2.52511	4.91557
VIT_01s0026g01870	Avr9/Cf-9 induced kinase 1			Response to Stress	2.30644	3.75603
VIT_01s0026g02590	calcium-binding EF hand	K13448	vv34626Plant-pathogen_interaction	Response to Stress	2.70533	5.36026
VIT_01s0150g00440	respiratory burst oxidase protein D (RBOHD)	RBOHD	vv34626Plant-pathogen_interaction vv50105Transport_electron_carriers	Response to Stress	2.24409	4.07292
VIT_03s0038g01770	disease resistance protein (CC-NBS-LRR class)			Response to Stress	2.26045	2.99216
VIT_04s0069g01010	harpin-induced protein			Response to Stress	2.01193	2.93912
VIT_06s0004g00690	calmodulin-binding region IQ			Response to Stress	2.82976	7.32205
VIT_06s0004g03100	MLO1	K08472		Response to Stress	2.40553	3.61889
VIT_07s0031g01130	ascorbate oxidase	E1_10_3_3	vv10053Ascorbate_and_aldarate_metabolism vv50109Incompletely_characterized_transport_systems	Response to Stress	2.09592	3.94157
VIT_08s0040g02170	MLO6 (MILDEW RESISTANCE LOCUS O 6)	K08472		Response to Stress	2.24064	3.77517
VIT_09s0002g04560	calmodulin-binding protein			Response to Stress	2.12464	3.48273
VIT_10s0071g00130	disease resistance protein (TIR-NBS-LRR class)	RPROT	vv34627R_proteins_from_Plant-pathogen_interaction	Response to Stress	2.17293	3.98244
VIT_10s0071g00150	disease resistance protein (TIR-NBS-LRR class)	RPROT	vv34627R_proteins_from_Plant-pathogen_interaction	Response to Stress	2.10668	4.06349
VIT_10s0071g00190	disease resistance protein (TIR-NBS-LRR class)	RPROT	vv34627R_proteins_from_Plant-pathogen_interaction	Response to Stress	2.01672	3.71008
VIT_10s0071g00230	HcrVf1 protein			Response to Stress	2.55235	2.84433
VIT_11s0016g01060	Avr9/Cf-9 induced kinase 1			Response to Stress	2.42226	4.10993
VIT_11s0016g01970	calmodulin-binding region IQD6			Response to Stress	2.43308	6.06625
VIT_11s0118g00160	Disease resistance protein			Response to Stress	2.08904	3.54432
VIT_12s0035g02190	MLO-like protein 13	K08472		Response to Stress	2.2858	2.72475
VIT_14s0171g00050	Cf-2 gene	K13466	vv34626Plant-pathogen_interaction	Response to Stress	2.43605	2.586
VIT_15s0045g01020	disease resistance protein (NBS-LRR class)	K13453	vv34627R_proteins_from_Plant-pathogen_interaction	Response to Stress	2.4164	4.16446
VIT_16s0050g01390	SRC2/SRC2 (SOYBEAN GENE REGULATED BY COLD-2)			Response to Stress	2.44579	4.3719
VIT_17s0000g03370	calmodulin-binding protein	K02183	vv34020Calcium_signaling_pathway vv34626Plant-pathogen_interaction	Response to Stress	2.16231	3.04843
VIT_17s0000g03390	Calmodulin binding protein	K02183	vv34020Calcium_signaling_pathway vv34626Plant-pathogen_interaction	Response to Stress	2.19777	3.9931
VIT_04s0008g00130	Avr9/Cf-9 rapidly elicited protein 146			Response to Stress	-2.02306	-3.16339
VIT_06s0004g05770	heat shock protein 17.4 kDa class I	K13993	vv24141Protein_processing_in_endoplasmic_reticulum	Response to Stress	-2.07912	-3.80848
VIT_12s0028g01370	PMR5 (POWDERY MILDEW RESISTANT 5)			Response to Stress	-2.9709	-2.6073
VIT_18s0089g01270	Heat shock protein precursor 22.0 kDa class IV	K13993	vv24141Protein_processing_in_endoplasmic_reticulum	Response to Stress	-2.198	-3.72574
VIT_00s2071g00010	cis-prenyltransferase	E2_5_1_31	vv10900Terpenoid_biosynthesis	Secondary Metabolic Process	2.59262	4.51977
VIT_02s0012g00320	norcoclaurine synthase	E4_2_1_78	vv10950Alkaloid_biosynthesis_I	Secondary Metabolic Process	2.45753	3.48407
VIT_02s0012g00400	flavonol synthase	E1_14_17_4	vv10640Propanoate_metabolism vv30008Ethylene_signaling	Secondary Metabolic Process	2.64	4.75707
VIT_03s0017g02110	Anthocyanidin 3-O-glucosyltransferase	E2_4_1_115	vv10942Anthocyanin_biosynthesis	Secondary Metabolic Process	2.12168	3.3049
VIT_03s0063g01690	flavonoid 3-monooxygenase	E1_14_13_21	vv10941Flavonoid_biosynthesis	Secondary Metabolic Process	2.85956	3.61123
VIT_06s0004g02620	Phenylalanine ammonia-lyase	E4_3_1_5	vv10350Tyrosine_metabolism vv10360Phenylalanine_metabolism vv10910Nitrogen_metabolism vv10940Phenylpropanoid_biosynthesis	Secondary Metabolic Process	2.59483	4.27514
VIT_06s0004g08150	trans-cinnamate 4-monooxygenase	E1_14_13_11	vv10360Phenylalanine_metabolism vv10940Phenylpropanoid_biosynthesis	Secondary Metabolic Process	2.49655	4.28915
VIT_06s0080g00090	CYP94A1			Secondary Metabolic Process	2.88253	5.26046
VIT_08s0040g01710	Phenylalanine ammonia-lyase	E4_3_1_5	vv10350Tyrosine_metabolism vv10360Phenylalanine_metabolism vv10910Nitrogen_metabolism vv10940Phenylpropanoid_biosynthesis	Secondary Metabolic Process	2.84083	5.24577
VIT_10s0042g00890	stilbene synthase 1 [Vitis vinifera]	E2_3_1_95	vv10940Phenylpropanoid_biosynthesis	Secondary Metabolic Process	3.07863	6.35809
VIT_10s0042g00920	Stilbene synthase	E2_3_1_95	vv10940Phenylpropanoid_biosynthesis	Secondary Metabolic Process	3.13815	6.19244
VIT_11s0052g01090	4-coumarate-CoA ligase 2	E6_2_1_12	vv10940Phenylpropanoid_biosynthesis vv50104Group_translocators	Secondary Metabolic Process	2.07374	3.76545
VIT_14s0068g00930	chalcone synthase 1	E2_3_1_74	vv10941Flavonoid_biosynthesis	Secondary Metabolic Process	3.3981	3.71158
VIT_16s0039g01070	Glutathione S-transferase 25 GSTU7	E2_5_1_18_GSTU7	vv10480Glutathione_metabolism	Secondary Metabolic Process	2.3206	3.92534
VIT_16s0039g01280	phenylalanin ammonia-lyase [Vitis vinifera]	E4_3_1_5	vv10350Tyrosine_metabolism vv10360Phenylalanine_metabolism vv10910Nitrogen_metabolism vv10940Phenylpropanoid_biosynthesis	Secondary Metabolic Process	4.61943	7.47632
VIT_18s0001g10180	N-hydroxycinnamoyl/benzoyltransferase 3			Secondary Metabolic Process	2.64349	4.02166
VIT_18s0001g10200	N-hydroxycinnamoyl/benzoyltransferase 6			Secondary Metabolic Process	2.33812	3.71758
VIT_18s0001g10230	N-hydroxycinnamoyl/benzoyltransferase 3			Secondary Metabolic Process	2.02616	3.34761
VIT_18s0041g00710	UDP-glucose: anthocyanidin 5,3-O-glucosyltransferase	RHGT1	vv10942Anthocyanin_biosynthesis	Secondary Metabolic Process	2.08904	4.40449
VIT_18s0076g00340	CYP707A3			Secondary Metabolic Process	2.13783	4.04698
VIT_18s0089g00700	CYP714A1			Secondary Metabolic Process	2.24097	2.46526
VIT_19s0090g00140	5-alpha-taxadienol-10-beta-hydroxylase	E1_14_13_76	vv10904Diterpenoid_biosynthesis	Secondary Metabolic Process	2.62544	3.02969
VIT_07s0255g00090	CYP82C1p			Secondary Metabolic Process	-2.46055	-5.37187
VIT_18s0041g00920	UDP-glucose: anthocyanidin 5,3-O-glucosyltransferase	RHGT1	vv10942Anthocyanin_biosynthesis	Secondary Metabolic Process	-2.77514	-4.21003
VIT_00s0437g00070	receptor kinase RK20-1			Signal Transduction	2.38361	2.65285
VIT_00s0743g00020	S-locus lectin protein kinase			Signal Transduction	2.24895	3.67531
VIT_00s0748g00020	receptor kinase RK20-1			Signal Transduction	3.44952	5.27149
VIT_00s2659g00010	CRK10 (CYSTEINE-RICH RLK10)			Signal Transduction	2.80115	4.50801
VIT_03s0063g00510	Leucine-rich repeat			Signal Transduction	2.60873	4.23132
VIT_03s0097g00130	Concanavalin A lectin			Signal Transduction	2.22671	4.02442
VIT_04s0044g00750	S-receptor kinase			Signal Transduction	2.19167	3.27974
VIT_04s0079g00020	Cysteine-rich receptor-like protein kinase 2			Signal Transduction	4.84236	4.12749
VIT_05s0020g03240	S-receptor kinase			Signal Transduction	2.0443	2.95376
VIT_05s0020g03270	S-receptor kinase			Signal Transduction	2.30724	3.28062
VIT_05s0020g04570	CBL-interacting protein kinase 7 (CIPK7)	CIPK7		Signal Transduction	2.01072	3.41089
VIT_07s0005g04050	Leucine Rich Repeat receptor-like kinase			Signal Transduction	2.12233	5.77326
VIT_07s0141g00440	unc51-like kinase	K08269	vv44140Regulation_of_autophagy vv34150mTOR_signaling_pathway vv60004ARF	Signal Transduction	2.16322	3.07675
VIT_10s0003g01990	RKF1 (RECEPTOR-LIKE KINASE IN FLOWERS 1)			Signal Transduction	2.03933	2.74595
VIT_10s0042g00600	Leucine Rich Repeat receptor-like kinase			Signal Transduction	2.90702	5.06328
VIT_10s0042g00700	Leucine-rich repeat receptor-like protein kinase 1			Signal Transduction	2.44998	4.77098
VIT_11s0016g03740	Rho guanyl-nucleotide exchange factor ROPGEF8	ROPGEF8		Signal Transduction	2.1069	2.22528
VIT_13s0156g00580	S-receptor kinase			Signal Transduction	2.99558	4.42581
VIT_13s0156g00590	S-receptor kinase			Signal Transduction	2.36386	3.15568
VIT_14s0066g02680	leucine-rich repeat protein kinase			Signal Transduction	2.47394	2.82986
VIT_16s0039g01870	Protein kinase			Signal Transduction	3.11451	5.37178
VIT_16s0050g01400	C2 domain-containing protein			Signal Transduction	2.08395	3.41449
VIT_17s0000g04380	wall-associated kinase 1 (WAK1)			Signal Transduction	2.58149	5.68109
VIT_17s0000g09290	protein kinase ATN1			Signal Transduction	2.53574	2.52814
VIT_18s0001g11240	MAPKKK5 (Mitogen-activated protein kinase kinase kinase 5)			Signal Transduction	2.05379	3.11778
VIT_18s0166g00230	S-receptor kinase			Signal Transduction	2.71828	3.30607
VIT_19s0014g04050	S-locus lectin protein kinase			Signal Transduction	2.18072	3.66066
VIT_01s0137g00360	transducin family protein / WD-40 repeat			Transcription Factor Activity	2.34215	2.48889
VIT_04s0069g00970	WRKY DNA-binding protein 51	WRKY51_1	vv60066WRKY	Transcription Factor Activity	2.45461	4.13292
VIT_05s0020g04780	basic helix-loop-helix (bHLH) family	BHLHDOM_52	vv60011BHLH	Transcription Factor Activity	2.52629	6.25938
VIT_06s0004g00020	NAC domain containing protein 32	NAC032	vv60046NAC	Transcription Factor Activity	2.35393	5.19899
VIT_08s0007g02940	NAC domain containing protein 90	NAC090_1	vv60046NAC	Transcription Factor Activity	3.42741	6.57902
VIT_08s0058g00690	WRKY DNA-binding protein 33	WRKY33_3	vv34626Plant-pathogen_interaction vv60066WRKY	Transcription Factor Activity	2.62123	4.70618
VIT_10s0003g02810	WRKY DNA-binding protein 71	WRKY71_1	vv60066WRKY	Transcription Factor Activity	2.11714	2.32944
VIT_11s0016g02070	basic helix-loop-helix (bHLH) family	BHLHDOM_63	vv60011BHLH	Transcription Factor Activity	2.56131	3.91316
VIT_12s0028g02530	zinc finger (C3HC4-type RING finger)	ZFC3HC4_36	vv60078Other_zf-C3HC4	Transcription Factor Activity	2.52244	4.1265
VIT_13s0067g03130	WRKY DNA-binding protein 55	WRKY55	vv60066WRKY	Transcription Factor Activity	3.14228	5.8588
VIT_17s0000g05810	WRKY DNA-binding protein 72	WRKY72_2	vv60066WRKY	Transcription Factor Activity	2.08134	3.39985
VIT_18s0001g08380	homeobox protein knotted-1 like 1 (KNAT1)	KNAT1_1	vv60034HB	Transcription Factor Activity	2.4259	2.20261
VIT_18s0122g01230	zinc finger (C3HC4-type RING finger)	ZFC3HC4_74	vv60078Other_zf-C3HC4	Transcription Factor Activity	3.77405	5.48998
VIT_19s0015g01280	myb domain protein 103	MYB103_2	vv60044MYB	Transcription Factor Activity	2.60925	4.82924
VIT_19s0027g00870	NAC domain-containing protein 42	NAC042_3	vv60046NAC	Transcription Factor Activity	2.11127	2.95848
VIT_19s0090g00840	WRKY DNA-binding protein 6	WRKY6_2	vv60066WRKY	Transcription Factor Activity	2.50624	4.71263
VIT_11s0016g02210	GATA transcription factor 24	GAT24	vv60016C2C2-GATA	Transcription Factor Activity	-2.83846	-4.87167
VIT_12s0057g00570	zinc finger (CCCH-type) family protein	CCCHFAM_30	vv60018C3H	Transcription Factor Activity	-2.09052	-2.6675
VIT_13s0064g01030	zinc finger (C3HC4-type RING finger)BIG BROTHER	BIGBROTHER_1	vv60078Other_zf-C3HC4	Transcription Factor Activity	-2.64209	-2.91294
VIT_17s0000g00330	Inducer of CBF expression 1 ICE1	ICE1_3	vv60011BHLH	Transcription Factor Activity	-2.01423	-3.19473
VIT_17s0000g06820	zinc finger (C2H2 type) family	C2H2FAM_1	vv60017C2H2	Transcription Factor Activity	-2.33282	-3.40638
VIT_00s0125g00190	potassium transporter (KUP1)	KUP1	vv50125Porters_cat_66_to_94	Transport	2.12492	3.21555
VIT_01s0011g02480	phospholipid-transporting ATPase	K01530	vv50131Primary_active_transporter_cat_A2_to_A4	Transport	2.05618	3.87453
VIT_01s0011g04210	Amino acid permease	AAPREL	vv50123Porters_cat_18_to_29	Transport	2.65199	3.17711
VIT_01s0127g00070	NITRATE TRANSPORTER2.5	NRT2_5	vv50121Porters_cat_1_to_6	Transport	2.52094	2.0033
VIT_03s0017g01280	ABC transporter G member 7	ABCG7	vv52010ABC_transporters	Transport	2.22393	2.53681
VIT_03s0038g03950	phosphate carrier protein	MPHOSPTR	vv50123Porters_cat_18_to_29	Transport	2.18857	2.24496
VIT_05s0020g03930	Sulfate transporter 3.1 (AST12) (AtST1)	SULTR3_1	vv50124Porters_cat_30_to_64	Transport	4.02683	3.52158
VIT_05s0020g04280	Ca2+-ATPase 13 ACA13, plasma membrane	K01537	vv34020Calcium_signaling_pathway vv50131Primary_active_transporter_cat_A2_to_A4	Transport	2.49401	4.62137
VIT_05s0020g04390	Ca2+-ATPase 13 ACA13, plasma membrane	K01537	vv34020Calcium_signaling_pathway vv50131Primary_active_transporter_cat_A2_to_A4	Transport	2.16969	4.79963
VIT_05s0049g00930	inorganic phosphate transporter 1-4	PHT1_4	vv50121Porters_cat_1_to_6	Transport	2.00699	3.34084
VIT_05s0077g00810	sodium-inducible calcium-binding protein (ACP1)	ACP1	vv50123Porters_cat_18_to_29	Transport	2.17386	4.71038
VIT_06s0004g04010	exocyst subunit EXO70 H7	EXO70H7	vv50111Tethering_factors	Transport	2.01557	3.61384
VIT_07s0005g02660	ABC transporter B member 13	ABCB13	vv52010ABC_transporters	Transport	2.26999	3.19258
VIT_08s0007g04860	nodulin family protein			Transport	3.25913	3.34087
VIT_08s0040g02730	exocyst subunit EXO70 H4	EXO70H4	vv50111Tethering_factors	Transport	2.08896	4.01599
VIT_08s0058g00140	AMMONIUM TRANSPORTER 2	AMT2	vv50101Channels_and_pores	Transport	2.43184	3.07046
VIT_09s0002g05370	ABC transporter g family pleiotropic drug resistance 12 PDR12	ABCGPDR12	vv52010ABC_transporters	Transport	2.52443	4.29242
VIT_09s0002g05400	Pleiotropic drug resistance protein 1	ABCGPDR12	vv52010ABC_transporters	Transport	2.73459	5.06459
VIT_10s0003g00680	glutamate receptor protein	GLR2_7	vv50101Channels_and_pores	Transport	2.34033	4.41834
VIT_10s0003g00760	glutamate receptor protein	GLR2_9	vv50101Channels_and_pores	Transport	2.74596	3.93531
VIT_10s0003g01220	copper-binding family protein			Transport	2.28853	4.61454
VIT_11s0016g02470	Carrier protein, Mitochondrial	K03454	vv50123Porters_cat_18_to_29	Transport	2.00172	3.39423
VIT_11s0118g00490	octicosapeptide/Phox/Bem1p (PB1) domain-containing protein / tetratricopeptide repeat (TPR)-containing protein	BEM1P	vv50132Primary_active_transporter_cat_A5_to_A8	Transport	2.01209	3.43321
VIT_14s0066g02060	AAA-type ATPase			Transport	2.87915	5.3447
VIT_15s0021g00330	proton-dependent oligopeptide transport (POT) family protein	POT	vv50122Porters_cat_7_to_17	Transport	2.28505	2.64834
VIT_19s0014g01770	glutamate receptor protein	GLR2_7	vv50101Channels_and_pores	Transport	4.41328	5.57889
VIT_19s0014g01830	glutamate receptor protein	GLR2_6	vv50101Channels_and_pores	Transport	2.9829	4.64141
VIT_00s0225g00080	MATE efflux family protein	MATE	vv50125Porters_cat_66_to_94	Transport	-2.11695	-2.5329
VIT_08s0040g00830	proton-dependent oligopeptide transport (POT) family protein	POT	vv50122Porters_cat_7_to_17	Transport	-2.10329	-6.90053
VIT_18s0001g15700	GLTP3 (GLYCOLIPID TRANSFER PROTEIN 3)	GLTP3		Transport	-2.19181	-4.43063
VIT_00s0160g00340	unknown			unknown	2.03564	3.26354
VIT_01s0011g03850	Unknown protein			unknown	2.07815	3.90235
VIT_01s0137g00030	ATA1 (ARABIDOPSIS TAPETUM 1)			unknown	2.0848	2.7492
VIT_02s0025g00540	unknown			unknown	2.35844	3.55544
VIT_05s0020g01080	unknown			unknown	2.05944	3.12161
VIT_06s0004g06600	unknown protein			unknown	2.25453	4.02009
VIT_06s0009g03470	Unknown protein			unknown	3.04662	5.42737
VIT_08s0007g01070	DC1 domain-containing protein			unknown	2.41868	3.68977
VIT_08s0007g08520	Unknown protein			unknown	2.02324	4.37166
VIT_08s0040g01930	Unknown protein			unknown	2.52679	4.57451
VIT_08s0040g02430	Unknown protein			unknown	2.23609	3.70433
VIT_09s0002g06900	NtEIG-A1			unknown	2.50512	3.29278
VIT_12s0035g00920	Unknown protein			unknown	2.91439	5.90966
VIT_13s0019g01360	unknown			unknown	2.1299	4.43021
VIT_13s0084g00670	Unknown protein			unknown	2.17981	4.16357
VIT_14s0066g01570	Unknown protein			unknown	2.70012	5.72157
VIT_14s0066g01590	NHL repeat-containing protein			unknown	2.18689	4.04158
VIT_16s0013g00070	unknown			unknown	2.0338	2.07355
VIT_16s0050g01650	unknown			unknown	2.0875	4.37675
VIT_18s0001g08820	Unknown protein			unknown	2.10748	4.22975
VIT_18s0001g11680	Unknown protein			unknown	3.59186	7.65663
VIT_18s0001g11950	Unknown protein			unknown	3.23468	3.25368
VIT_18s0001g14420	unknown			unknown	3.0026	4.30189
VIT_19s0015g01440	Unknown protein			unknown	2.11534	3.38031
VIT_01s0026g00670	Unknown protein			unknown	-2.41732	-2.2323
VIT_01s0026g00730	Unknown protein			unknown	-2.27804	-3.3467
VIT_12s0059g01640	Unknown protein			unknown	-2.43813	-3.82158
VIT_16s0022g02030	ERL1 (ERECTA 1)			unknown	-2.30712	-2.53
VIT_18s0001g10600	unknown			unknown	-2.38322	-3.26013

## Sheet: KOB_17-37_common DEGs
					log2 (Fold change)
gene_id	Gene Annotation	EC or Kegg ID	Network	Functional Cathegory	GAG-KOB vs GAG-1103P	GAG-17-37 vs GAG-1103P
VIT_12s0134g00020	isoprene synthase	E4_2_3_27	vv10900Terpenoid_biosynthesis	Secondary Metabolic Process	3.47041	4.04292

## Sheet: KOB_3309C_common DEGs
					log2 (Fold change)
gene_id	Gene Annotation	EC or Kegg ID	Network	Functional Cathegory	GAG-KOB vs GAG-1103P	GAG-3309C vs GAG-1103P
VIT_11s0016g02280	glycine dehydrogenase 2	E1_4_4_2	vv10260Glycine_serine_and_threonine_metabolism	Cellular Amino Acids and Derivative Metabolic Process	2.21536	2.0374
VIT_11s0037g00290	plastocyanin domain-containing protein	K02638	vv10195Photosynthesis vv50113Thylakoid_targeting_pathway	Generation of Energy	3.6405	2.134
VIT_18s0001g14760	lipase 3 (EXL3) family II extracellular			Lipid Metabolic Process	-2.49154	-2.26445
VIT_14s0068g00200	no hit			no hit	2.2458	2.04687
VIT_03s0038g00950	Auxin-responsive SAUR9	SAUR9	vv30003Auxin_signaling	Response to Hormone Stimulus	-2.04297	-2.25848
VIT_02s0025g04300	Thaumatin			Response to Stress	2.02755	2.97704
VIT_16s0050g01680	UDP-glucose: anthocyanidin 5,3-O-glucosyltransferase	RHGT1	vv10942Anthocyanin_biosynthesis	Secondary Metabolic Process	2.34982	3.22777
VIT_00s0258g00020	receptor serine/threonine kinase			Signal Transduction	2.16283	2.30988
VIT_04s0044g00640	S-receptor kinase			Signal Transduction	2.02363	2.20307
VIT_05s0020g03290	S-receptor kinase			Signal Transduction	2.10401	2.19105
VIT_01s0011g00400	nuclear transport factor 2 (NTF2)	NTF2	vv50133Primary_active_transporter_cat_A9_to_A18	Transport	2.16354	2.01281
VIT_14s0060g01780	Unknown protein			unknown	2.58845	2.07182
VIT_12s0059g00490	unknown			unknown	-2.5827	-2.09268

## Sheet: 41B_17-37_common DEGs
					log2 (Fold change)
gene_id	Gene Annotation	EC or Kegg ID	Network	Functional Cathegory	GAG-41B vs GAG-1103P	GAG-17-37 vs GAG-1103P
VIT_11s0149g00350	chitinase-3 protein 1 precursor	E3_2_1_14	vv10530Aminosugars_metabolism	Carbohydrate Metabolic Process	2.70084	2.50049
VIT_09s0002g02940	Myo-inositol oxygenase 1	E1_13_99_1	vv10562Inositol_phosphate_metabolism	Carbohydrate Metabolic Process	-3.8561	-3.01838
VIT_03s0063g02650	hydrolase, alpha/beta fold			Cellular Process	2.92132	2.32209
VIT_08s0007g02280	phospholipase C	E3_1_4_3	vv10260Glycine_serine_and_threonine_metabolism vv10562Inositol_phosphate_metabolism vv10564Glycerophospholipid_metabolism vv10565Ether_lipid_metabolism vv34020Calcium_signaling_pathway	Lipid Metabolic Process	-3.44284	-2.12673
VIT_09s0002g03700	no hit			no hit	3.16207	2.50095
VIT_19s0014g02180	no hit			no hit	3.62383	2.08423
VIT_00s0271g00110	FLAVODOXIN-LIKE QUINONE REDUCTASE 1	FQR1	vv30003Auxin_signaling	Response to Hormone Stimulus	2.36588	2.35375
VIT_04s0023g01100	Calmodulin	K02183	vv34020Calcium_signaling_pathway vv34626Plant-pathogen_interaction	Response to Stress	3.94921	2.12734
VIT_00s0731g00010	laccase	E1_10_3_2	vv11000Single_reactions vv50109Incompletely_characterized_transport_systems	Secondary Metabolic Process	3.31543	2.27985
VIT_07s0255g00080	transcriptional factor B3	TFB3_10	vv60001ABI3VP1	Transcription Factor Activity	3.63596	2.49159
VIT_12s0059g00860	SLAH1 (SLAC1 HOMOLOGUE 1)	SLAH1	vv50122Porters_cat_7_to_17	Transport	5.86787	3.50837
VIT_01s0011g04780	Unknown protein			unknown	2.73501	2.14429
VIT_18s0001g06150	Phosphate-induced protein 1			unknown	2.20007	-2.08843
VIT_18s0001g06170	Phosphate-induced protein 1			unknown	2.4095	-2.23425

## Sheet: 41B_3309C_common DEGs
					log2 (Fold change)
gene_id	Gene Annotation	EC or Kegg ID	Network	Functional Cathegory	GAG-3309C vs GAG-1103P	GAG-41B vs GAG-1103P
VIT_05s0077g01150	Beta-1,3-glucanase	E3_2_1_6		Carbohydrate Metabolic Process	2.05742	2.07486
VIT_05s0094g00340	Chitinase class IV	E3_2_1_14	vv10530Aminosugars_metabolism	Carbohydrate Metabolic Process	2.47417	2.14407
VIT_15s0048g00640	L-lactate dehydrogenase	E1_1_1_27	vv10010Glycolysis vv10272Cysteine_metabolism vv10620Pyruvate_metabolism vv10640Propanoate_metabolism	Carbohydrate Metabolic Process	3.20896	3.87762
VIT_16s0050g02220	acidic endochitinase (CHIB1)	E3_2_1_14	vv10530Aminosugars_metabolism	Carbohydrate Metabolic Process	2.39949	3.48626
VIT_17s0000g04540	Enolase	E4_2_1_11	vv10010Glycolysis	Carbohydrate Metabolic Process	2.19559	2.27914
VIT_18s0001g05060	2,3-bisphosphoglycerate-dependent phosphoglycerate mutase	E5_4_2_1	vv10010Glycolysis	Carbohydrate Metabolic Process	2.15897	3.01818
VIT_05s0077g01310	Aldo-keto reductase	E1_1_1_21	vv10040Pentose_glucuronate_interconversion vv10051Fructose_and_mannose_metabolism vv10561Glycerolipid_metabolism vv10620Pyruvate_metabolism	Carbohydrate Metabolic Process	-2.28071	-2.0455
VIT_03s0088g00650	xyloglucan:xyloglucosyl transferase	E2_4_1_207	vv40006Cell_wall	Cell Wall Metabolism	3.0478	3.48253
VIT_01s0011g05390	invertase/pectin methylesterase inhibitor	PMEI	vv40006Cell_wall	Cell Wall Metabolism	-2.85103	-4.10716
VIT_01s0010g02450	B12D			Cellular Process	2.02642	2.82318
VIT_16s0050g01920	Curculin (mannose-binding) lectin			Cellular Process	-2.93276	-2.54725
VIT_11s0016g03770	dynein light chain LC6, flagellar outer arm	K10418	vv44810Regulation_of_actin_cytoskeleton	Developmental Process	2.60724	2.70503
VIT_18s0001g12610	RADIALIS-like protein 6	RADL6_2	vv30009Flower_development vv60044MYB	Developmental Process	2.2827	3.57522
VIT_03s0038g00310	SHORT INTERNODES	SHI_1	vv60059SRS	Developmental Process	-2.20233	-2.53113
VIT_07s0005g02510	phytochrome interacting factor 3 (PIF3)	PIF3_2	vv34710Circadian_rhythm vv60011BHLH	Developmental Process	-2.3895	-2.08647
VIT_17s0000g08480	ATMYB66/WER/WER1 (WEREWOLF 1)	WEREWOLF_6	vv44110Cell_cycle vv60044MYB	Developmental Process	-3.10356	-3.98206
VIT_11s0052g01730	1-deoxy-D-xylulose-5-phosphate synthase	E2_2_1_7	vv10100Biosynthesis_of_steroids	Lipid Metabolic Process	2.29391	4.73896
VIT_17s0000g02700	Alpha-dioxygenase 2	K10529	vv10592alpha-Linolenic_acid_metabolism	Lipid Metabolic Process	-2.85646	-5.51017
VIT_04s0008g07230	no hit			no hit	2.47271	5.34388
VIT_14s0083g00250	no hit			no hit	2.60274	3.06784
VIT_18s0001g08870	no hit			no hit	-2.37768	-2.23978
VIT_05s0049g00490	ethylene response factor ERF14	ERF14_2	vv30008Ethylene_signaling vv60003AP2_EREBP	Response to Hormone Stimulus	2.25823	2.52377
VIT_14s0108g00020	PIN8 (PIN-FORMED 8); auxin:hydrogen symporter/ transporter	PIN8	vv50004Auxin_transport vv50125Porters_cat_66_to_94	Response to Hormone Stimulus	2.19663	2.82807
VIT_11s0016g05640	IAA29	IAA29_2	vv30003Auxin_signaling vv60008AUXIAA	Response to Hormone Stimulus	-2.56623	-2.94003
VIT_09s0002g07680	Disease resistance protein			Response to Stress	2.39887	3.51111
VIT_09s0002g07750	disease resistance protein			Response to Stress	2.25783	3.30221
VIT_09s0070g00640	disease resistance protein			Response to Stress	2.04608	3.16492
VIT_11s0016g02860	Nudix hydrolase 8			Response to Stress	2.27344	3.10656
VIT_12s0055g01030	peroxidase	E1_11_1_7	vv10360Phenylalanine_metabolism vv10680Methane_metabolism	Response to Stress	3.41159	3.73995
VIT_13s0067g01940	Bet v I allergen	RCAR10	vv30001ABA_signaling	Response to Stress	2.22759	4.20332
VIT_14s0081g00780	disease resistance protein RPS2	RPROT	vv34627R_proteins_from_Plant-pathogen_interaction	Response to Stress	2.06847	2.38367
VIT_18s0001g10830	patatin			Response to Stress	2.3413	2.35169
VIT_04s0023g02480	Dehydrin 1b			Response to Stress	-2.28232	-3.01717
VIT_11s0016g01520	phenylalanine ammonia-lyase	E4_3_1_5	vv10350Tyrosine_metabolism vv10360Phenylalanine_metabolism vv10910Nitrogen_metabolism vv10940Phenylpropanoid_biosynthesis	Secondary Metabolic Process	2.92426	3.59159
VIT_13s0067g00110	CYP72A1	K13400	vv10902Monoterpenoid_biosynthesis	Secondary Metabolic Process	-3.20653	-2.35116
VIT_04s0008g00320	leucine-rich repeat family protein			Signal Transduction	2.49827	2.10189
VIT_04s0008g00440	CLAVATA1 receptor kinase (CLV1)			Signal Transduction	2.049	2.07345
VIT_08s0007g06560	lectin protein kinase			Signal Transduction	2.14018	2.17951
VIT_09s0002g02460	phosphatase			Signal Transduction	2.91596	3.06165
VIT_09s0002g07610	leucine-rich repeat family			Signal Transduction	2.01515	3.05311
VIT_09s0002g07720	leucine-rich repeat family protein			Signal Transduction	2.26359	3.53182
VIT_10s0071g00450	S-locus lectin protein kinase			Signal Transduction	2.08511	2.63729
VIT_12s0055g00580	receptor protein kinase			Signal Transduction	2.23723	2.52553
VIT_16s0050g01940	S-locus lectin protein kinase			Signal Transduction	2.05459	2.38446
VIT_16s0148g00290	Ser/Thr receptor-like kinase1			Signal Transduction	2.02964	3.10238
VIT_17s0000g04390	cold-induced wall associated kinase			Signal Transduction	2.32938	3.74351
VIT_01s0026g01420	Wall-associated kinase 4			Signal Transduction	-2.14709	-2.18281
VIT_04s0008g05750	WRKY DNA-binding protein 18	WRKY18_1	vv60066WRKY	Transcription Factor Activity	2.3532	3.3921
VIT_00s0203g00170	myb domain protein 92	MYB92_1	vv60044MYB	Transcription Factor Activity	-2.0672	-2.03497
VIT_12s0057g01330	zinc finger (C3HC4-type RING finger)	ZFC3HC4_219	vv60078Other_zf-C3HC4	Transcription Factor Activity	-2.01483	-2.77394
VIT_19s0014g03820	myb domain protein 102	MYB102_2	vv60044MYB	Transcription Factor Activity	-2.99399	-2.71952
VIT_02s0025g03130	nodulin MtN21 family	MTN21	vv50122Porters_cat_7_to_17	Transport	2.24634	2.44343
VIT_04s0043g00820	syntaxin 1B/2/3/4	K08486	vv24130SNARE_interactions_in_vesicular_transport vv50101Channels_and_pores	Transport	2.03213	3.51275
VIT_05s0049g00450	nodulin MtN21 family	MTN21	vv50122Porters_cat_7_to_17	Transport	3.22972	3.93751
VIT_14s0006g02260	MATE efflux family protein	MATE	vv50125Porters_cat_66_to_94	Transport	2.24579	2.10639
VIT_16s0050g02540	nodulin MtN3 family			Transport	2.05004	2.3548
VIT_18s0001g00320	LYS/HIS TRANSPORTER 7 LHT7	LHT7	vv50123Porters_cat_18_to_29	Transport	2.03381	2.79392
VIT_11s0016g05840	protease inhibitor/seed storage/lipid transfer protein (LTP)			Transport	-2.27997	-2.99891
VIT_13s0019g05060	nodulin-like protein			Transport	-2.0868	-5.07123
VIT_14s0066g01420	nodulin MtN3 family			Transport	-2.01241	-3.45063
VIT_14s0068g02190	chloride channel protein B	K05393_CLCB	vv50124Porters_cat_30_to_64	Transport	-2.52294	-2.92815
VIT_14s0066g00120	Unknown protein			unknown	3.27829	2.28079
VIT_18s0122g00280	Unknown protein			unknown	-2.21134	-2.52851

[truncated: 5 more sheets: 17-37_3309C_common DEGs, KOB_unique DEGs, 3309C_unique DEGs, 41B_unique DEGs, 17-37_unique DEGs]
